# Supplementary material for: Highly fluorescent room temperature liquid crystalline S-annulated swallow tail perylene bisimide exhibiting enhanced electroluminescence (EQE > 11%)
Source: Royal Society of Chemistry journal article supplement (doi:10.1039/d3tc04407f), 2024-01-01
Supplement: d3tc04407f1.pdf [file d3tc04407f1.pdf]

## Supporting information

### **Highly Fluorescent Room Temperature Liquid Crystalline S-Annulated Swallow Tail Perylene Bisimide exhibiting Enhanced Electroluminescence (EQE > 11%)**

Paresh Kumar Behera,<sup>a</sup> Sushanta Lenka,<sup>b</sup> Feng-Rong Chen,<sup>b</sup> Prakalp Gautam,<sup>b</sup> Iram Siddiqui,<sup>b</sup> D. S. Shankar Rao,<sup>c</sup> Jwo-Huei Jou\*<sup>b</sup>, and Ammathnadu Sudhakar Achalkumar\*<sup>a,d</sup>

<sup>a</sup>*Department of Chemistry, Indian Institute of Technology Guwahati, Guwahati, 781039, Assam, India.*

<sup>b</sup>*Department of Materials Science and Engineering National Tsing Hua University 101, Sec. 2, Kuang-Fu Road, Hsinchu 30013, Taiwan*

<sup>c</sup>*Centre for Nano and Soft Matter Sciences, Arkavathi Campus, Survey No.7, Shivanapura, Dasanapura Hobli, Bengaluru – 562162, India.*

<sup>d</sup>*Centre for Sustainable Polymers, Indian Institute of Technology Guwahati, Guwahati, 781039, Assam, India.*

## Table of Contents

| <b>Serial Number</b> | <b>Contents</b>                                           | <b>Page numbers</b> |
|----------------------|-----------------------------------------------------------|---------------------|
| 1                    | Materials and methods                                     | S3                  |
| 2                    | Experimental Section                                      | S4-S6               |
| 3                    | NMR Spectra                                               | S7-S8               |
| 4                    | MALDI-TOF Mass spectra                                    | S9                  |
| 5                    | Thermogravimetric analysis                                | S10                 |
| 6                    | Differential Scanning Calorimetry                         | S10                 |
| 7                    | Polarized Optical Microscopy                              | S11                 |
| 8                    | X-ray diffraction studies                                 | S11-S13             |
| 9                    | Photophysical studies                                     | S14                 |
| 10                   | Quantum yield measurement                                 | S14-S15             |
| 11                   | Cyclic Voltammetry                                        | S15                 |
| 12                   | Device Fabrication and characterization                   | S16-S18             |
| 13                   | Surface Morphology Studies (AFM)                          | S18                 |
| 14                   | DFT Studies                                               | S18-S21             |
| 15                   | TD-DFT and NTO calculations                               | S21-S24             |
| 16                   | Electron-hole correlation plots for the individual states | S25-S26             |
| 17                   | Solvatochromism                                           | S26-S27             |
| 18                   | Time resolved photoluminescence studies                   | S28                 |
| 19                   | References                                                | S29-S30             |

## 1. Materials and methods

Commercially available chemicals were utilized without further purification, and standard procedures were followed to dry the solvents. Chromatography was conducted using either silica gel (60-120 mesh) or neutral aluminum oxide. For thin-layer chromatography, aluminum sheets pre-coated with silica gel were employed. IR spectra were acquired at room temperature using a Perkin Elmer IR spectrometer (PerkinElmer UATR TWO). The spectral positions are reported in wave number ( $\text{cm}^{-1}$ ) units. NMR spectra were recorded using a 600MHz Nuclear Magnetic Resonance (NMR) Spectrometer (Make: Bruker, Model: AVANCE III HD). Chemical shifts in  $^1\text{H}$  NMR spectra were referenced to TMS as an internal standard and reported in ppm. Coupling constants were provided in Hz. Mass spectra were obtained using a MALDI-TOF mass spectrometer (Matrix Assisted Laser Desorption Ionization- Time of Flight, Make: BRUKER Model: AUTOFLEX SPEED) with  $\alpha$ -Cyano-4-hydroxycinnamic acid as a matrix. The liquid crystalline behavior of the mesogenic compounds, including birefringence and fluidity, was investigated using a polarizing optical microscope (Nikon Eclipse LV100POL) equipped with a programmable hot stage (Mettler Toledo FP90). Observations were made with clean glass slides and coverslips. Differential scanning calorimetry (DSC) under a nitrogen atmosphere was used to determine transition temperatures and associated enthalpy changes. A Mettler Toledo DSC1 instrument was employed, and the peak temperatures corresponding to transitions obtained from DSC were consistent with the polarizing optical microscopic observations. The first heating and cooling cycles were conducted at a rate of  $5\text{ }^\circ\text{C}/\text{min}$ , and the transition temperatures were recorded. Variable temperature XRD studies were performed using samples filled in Lindemann capillaries. A high-resolution X-ray powder diffractometer (PANalytical X'Pert PRO) equipped with a high-resolution fast detector PIXCEL was used. The sample temperature was controlled using a Mettler hot stage/programmer (FP82HT/FP90). Thermogravimetric analysis (TGA) was carried out using a thermogravimetric analyzer (Mettler Toledo, model TG/SDTA 851 e) under a nitrogen flow at a heating rate of  $10\text{ }^\circ\text{C}/\text{min}$ . UV-Vis spectra were recorded using a Perkin-Elmer Lambda 750 UV/VIS/NIR spectrometer. Fluorescence emission in solution state was investigated using either a Horiba Fluoromax-4 fluorescence spectrophotometer or a Perkin Elmer LS 50B spectrometer. The absolute photoluminescence quantum efficiencies (PLQYs) of the neat or doped films were determined using an integrating sphere under an  $\text{N}_2$  atmosphere. Cyclic Voltammetry (CV) studies were conducted using a Metrohm Autolab PGSTAT204 Electrochemical workstation with the assistance of NOVA software.

## 2. Experimental Section

### 2.1. Synthetic Scheme 1:

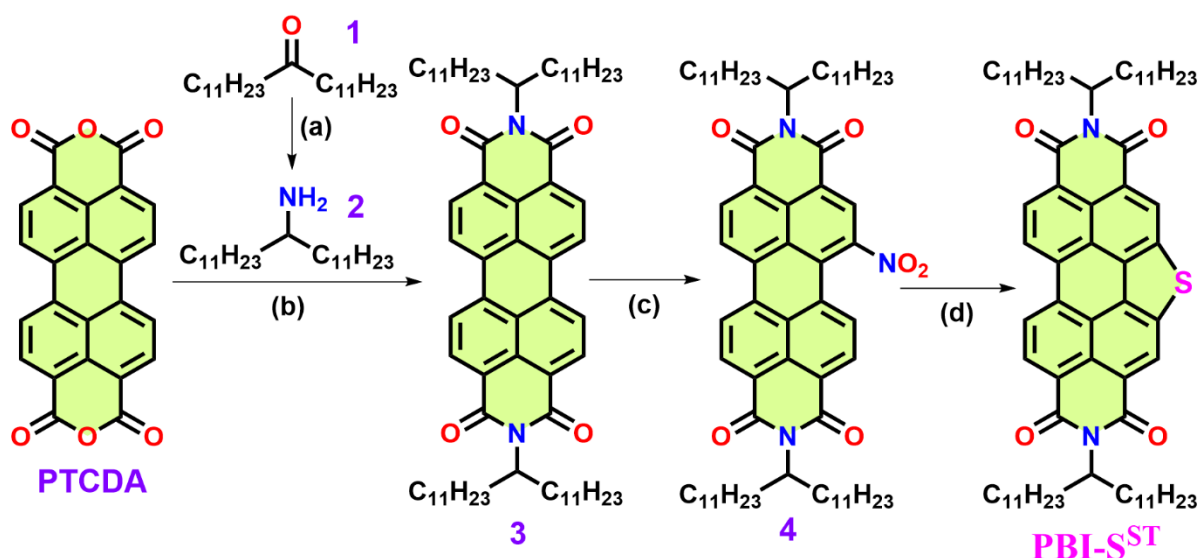

**Reagents and conditions:** (a)  $\text{NH}_4\text{OAc}$ ,  $\text{NaBH}_3\text{CN}$ , MeOH, RT, 72 h (95%); (b) **2**,  $\text{Zn}(\text{OAc})_2$ , imidazole, 160 °C, 2h, (92%); (c)  $\text{NaNO}_2$ ,  $\text{HNO}_3$ , 0 °C, 30 min., rt, 1 h (91%); (d) sulfur powder, anh. NMP,  $\text{N}_2$ , 70 °C, 0.5 h, 180 °C, 12 h (74%).

### 2.2 Synthetic Procedure:

#### 2.2.1 Synthetic route of Tricosan-12-amine (**2**):<sup>S1</sup>

A 250 mL round-bottom flask was charged with 12-tricosanone (**1**) (5 g, 14.76 mmol),  $\text{NH}_4\text{OAc}$  (11.35 g, 147.6 mmol),  $\text{NaBH}_3\text{CN}$  (1.275 g, 1.38 mmol) and MeOH (100 mL) and stirred at room temperature (r.t.) for 72 h, until the starting material was consumed (monitored by TLC). The reaction was quenched by drop wise addition of conc. HCl (~12 mL) and the solvents removed by rotary evaporation. The resulting white solid was dissolved in  $\text{H}_2\text{O}$  (200 mL) and adjust to ~pH 10 with KOH, then extracted with  $\text{CHCl}_3$  (3× 150 mL) to give desired product as a white solid (4.8g, 95.6%).  $^1\text{H-NMR}$  (600MHz,  $\text{CDCl}_3$ ):  $\delta$  = 0.88 (t, 6H), 1.10-1.50 (m, 42H), 2.68 ppm (s, 1H).

#### 2.2.2 Synthetic route of N, N-bis(Tricosan-12-amine)-perylene-3,4,9,10-tetracarboxylic Bisimide, (PBI<sup>ST</sup>) (**3**):<sup>S1</sup>

A mixture of perylene-3,4,9,10-tetracarboxylic dianhydride PTCDA (**3**) (2 g, 5.09 mmol),  $\text{Zn}(\text{OAc})_2$  (0.35 g, 1.61 mmol), imidazole (5 g) and tricosan-12-amine (3.548 g, 10.44 mmol) was vigorously stirred at 160 °C for 5h. After cooling to r.t. the mixture was dissolved in minimum amount of THF and precipitated in 1000 mL of 1N HCl/MeOH 2:1 v/v. The orange red precipitate was collected by filtration, washed with  $\text{H}_2\text{O}$  followed by MeOH, dried at 80

°C in vacuum and further purified by silica flash-column chromatography with CHCl<sub>3</sub>. The final product was recrystallized by chloroform-methanol system and obtained as orange solid (4.86 g, 92.1%). <sup>1</sup>H NMR (600 MHz, CDCl<sub>3</sub>, ppm): δ 8.67 (s, 2H), 8.63 (s, 2H), 8.60-8.59 (s, 4H), 5.20-5.15 (m, 2H), 2.27-2.17 (m, 4H), 1.87-1.86 (m, 4H), 1.31-1.19 (m, 72H), 0.83 (t, *J* = 6 Hz, 12H). <sup>13</sup>C NMR (150 MHz, CDCl<sub>3</sub>, ppm): δ 164.4, 163.57, 134.49, 131.89, 131.12, 129.59, 126.43, 123.94, 123.20, 123.00, 54.77, 32.37, 31.91, 29.62, 29.61, 29.55, 29.33, 26.97, 22.67, 22.55, 14.10. MALDI-TOF exact mass calculated for C<sub>70</sub>H<sub>103</sub>N<sub>2</sub>O<sub>4</sub> (M+H)<sup>+</sup>: 1035.78, found: 1035.367.

### 2.2.3 Synthetic route of N, N-bis(Tricosan-12-amine)-1-nitroperylene-3,4,9,10-tetracarboxydianhydride (4):<sup>S2</sup>

In a round bottom flask, compound **3** (2 g, 1.93 mmol) was dissolved in CH<sub>2</sub>Cl<sub>2</sub> (150 mL) and NaNO<sub>2</sub> (0.13 g, 1.93 mmol) was added to it. Then conc. HNO<sub>3</sub> (2.62 mL, 62.4 mmol) was added dropwise to the reaction mixture was stirred at 0 °C for 20-25 min. Then it was allowed to stir at rt. TLC was used for indicating completion of reaction. The reaction was quenched by adding H<sub>2</sub>O (90 mL). The layers were separated and the aqueous phase was extracted with CH<sub>2</sub>Cl<sub>2</sub> (3 times). The organic phases were combined, washed with water (3 times), dried over anhydrous Na<sub>2</sub>SO<sub>4</sub> and concentrated under reduced pressure. The residue was purified through silica gel column chromatography (CHCl<sub>3</sub>/Petroleum Ether 1:1) to afford compound **4** as a dark red solid (1.95 g, 90.8%). <sup>1</sup>H NMR (600 MHz, CDCl<sub>3</sub>, ppm): δ 8.80-8.71 (m, 5H), 8.61-8.58 (m, 1H), 8.26 (d, *J* = 6 Hz, 1H), 5.16 (m, 2H), 2.22 (t, *J* = 6 Hz, 4H), 1.85 (t, *J* = 6 Hz, 4H), 1.25-1.20 (m, 72H), 0.84 (t, *J* = 6 Hz, 12H).

### 2.2.5 Synthetic route of N, N-bis(Tricosan-12-amine)-S-annulated perylene-3,4,9,10-tetracarboxydianhydride (PBI-S<sup>ST</sup>):

A mixture of compound (**4**) (1 g, 0.92 mmol) and Sulfur powder (.30 g, 9.2 mmol) was heated to dissolve in *N*-methylpyrrolidone (20 mL) at 70 °C for 30 min. and then refluxed at 180 °C under Ar atmosphere for overnight until the starting material could not be detected by TLC. After cooling to room temperature, 2M HCl was added, then the precipitate was filtered, washed with water and dried. The crude product was purified by column chromatography on neutral alumina. Elution with 5-10 % CHCl<sub>3</sub>-Hexanes system followed by 20% CHCl<sub>3</sub>-Hexane system yields the desired product in good yield. Further purification was done by addition of concentrate solution of compound in cold methanol gives the waxy product (0.730 g, 74%).

$R_f = 0.6$  (10%  $\text{CHCl}_3$ -Hexane); IR:  $\nu_{\text{max}}$  in  $\text{cm}^{-1}$ : 2952, 2920, 2851, 1694, 1651, 1596, 1559, 1454, 1426, 1361, 1347, 1302, 1243, 1234, 1199, 1162, 1115, 911, 840, 808, 742, 721;  $^1\text{H}$  NMR (600 MHz,  $\text{CDCl}_3$ , ppm):  $\delta$  9.24-9.19 (m, 2H), 8.85-8.80 (m, 4H), 5.30 (m, 2H), 2.36-2.30 (m, 4H), 1.94-1.93 (m, 4H), 1.24-1.17 (m, 72H), 0.82-0.80 (t,  $J = 6$  Hz, 12H).  $^{13}\text{C}$  NMR (150 MHz,  $\text{CDCl}_3$ , ppm):  $\delta$  165.15, 164.72, 163.97, 163.65, 138.08, 133.00, 132.24, 130.03, 129.28, 127.87, 127.09, 126.13, 123.37, 122.96, 122.66, 122.25, 55.07, 32.49, 31.89, 29.72, 27.63, 29.32, 27.10, 22.65, 14.09. MALDI-TOF exact mass calculated for  $\text{C}_{70}\text{H}_{101}\text{N}_2\text{O}_4\text{S}$  ( $\text{M}+\text{H}^+$ ): 1065.7482, found: 1065.7496. Elemental analysis ( $\text{C}_{70}\text{H}_{100}\text{N}_2\text{O}_4\text{S}$ ): C: 78.90%, H: 9.46%, N: 2.63%, S: 3.01% (Expected); C: 79.26%, H: 9.51%, N: 2.82%, S: 2.87% (Observed).

### 3. NMR Spectra

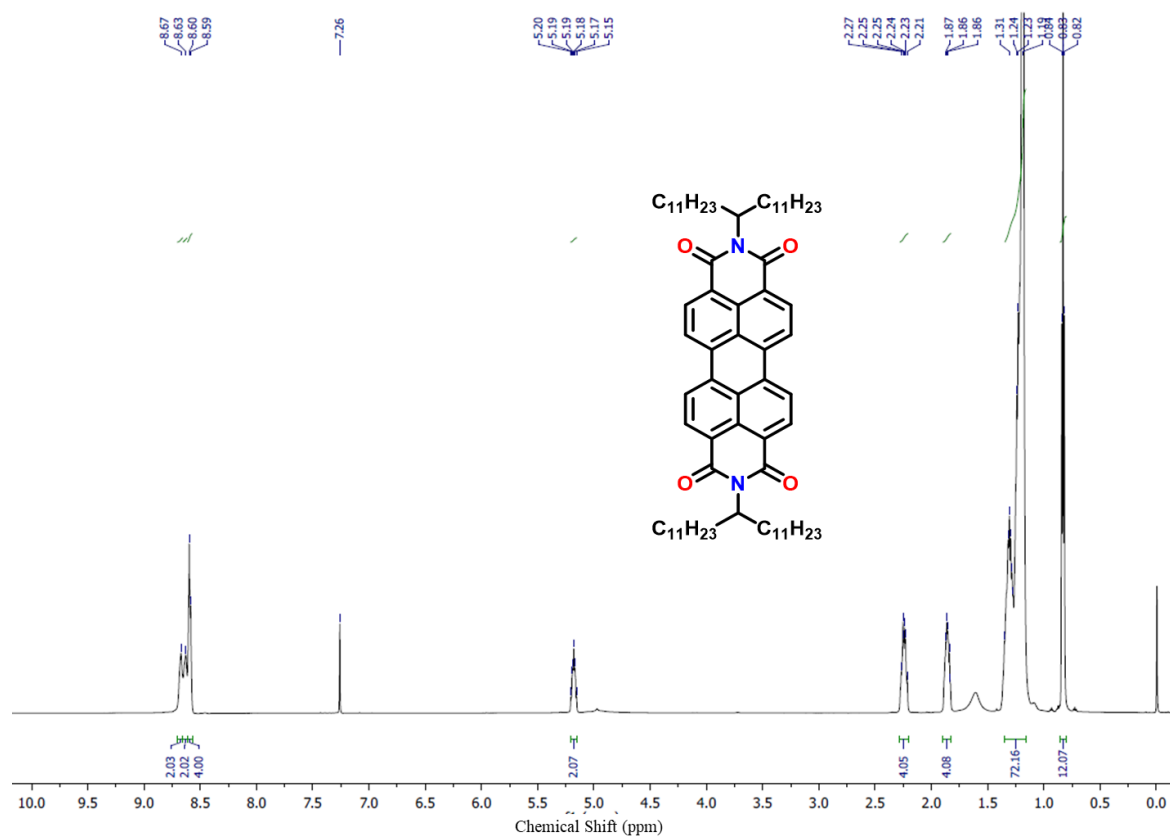

Figure S1.  $^1\text{H}$  NMR (600 MHz) spectra of  $\text{PBI}^{\text{ST}}$  in  $\text{CDCl}_3$ .

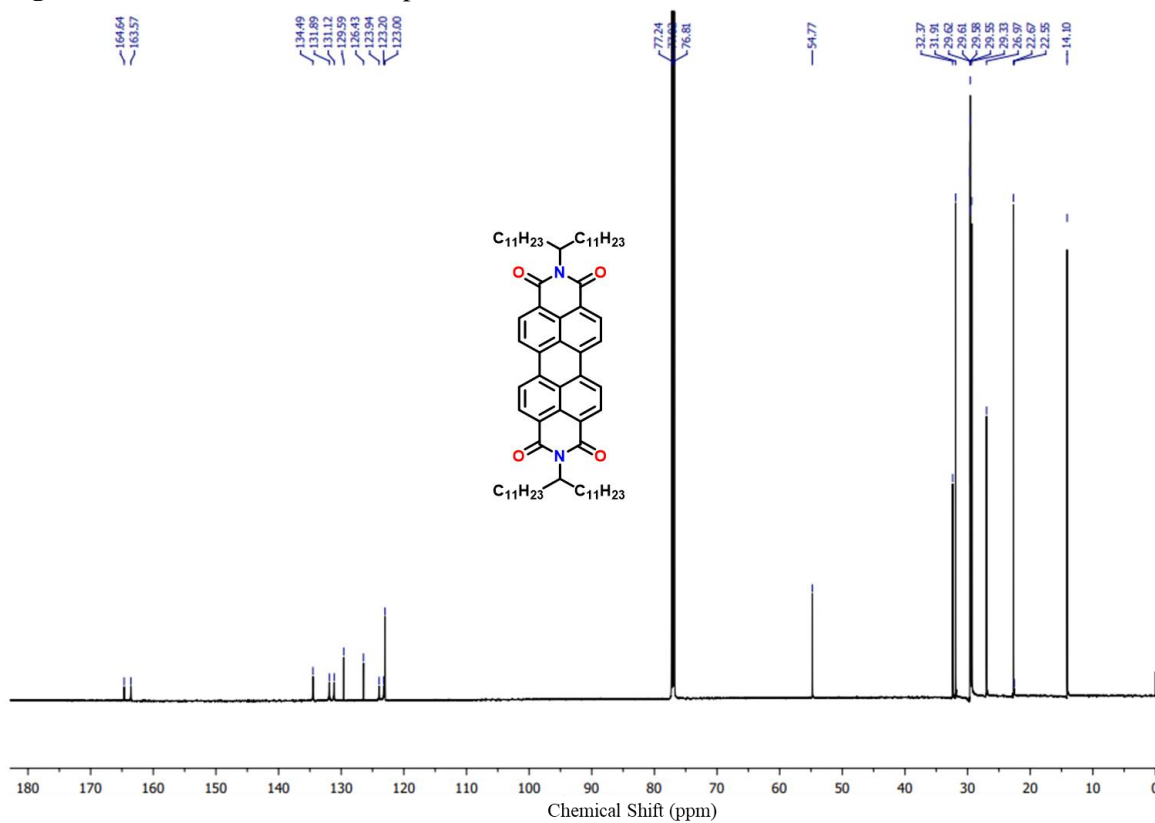

Figure S2.  $^{13}\text{C}$  NMR (150 MHz) spectra of  $\text{PBI}^{\text{ST}}$  in  $\text{CDCl}_3$ .

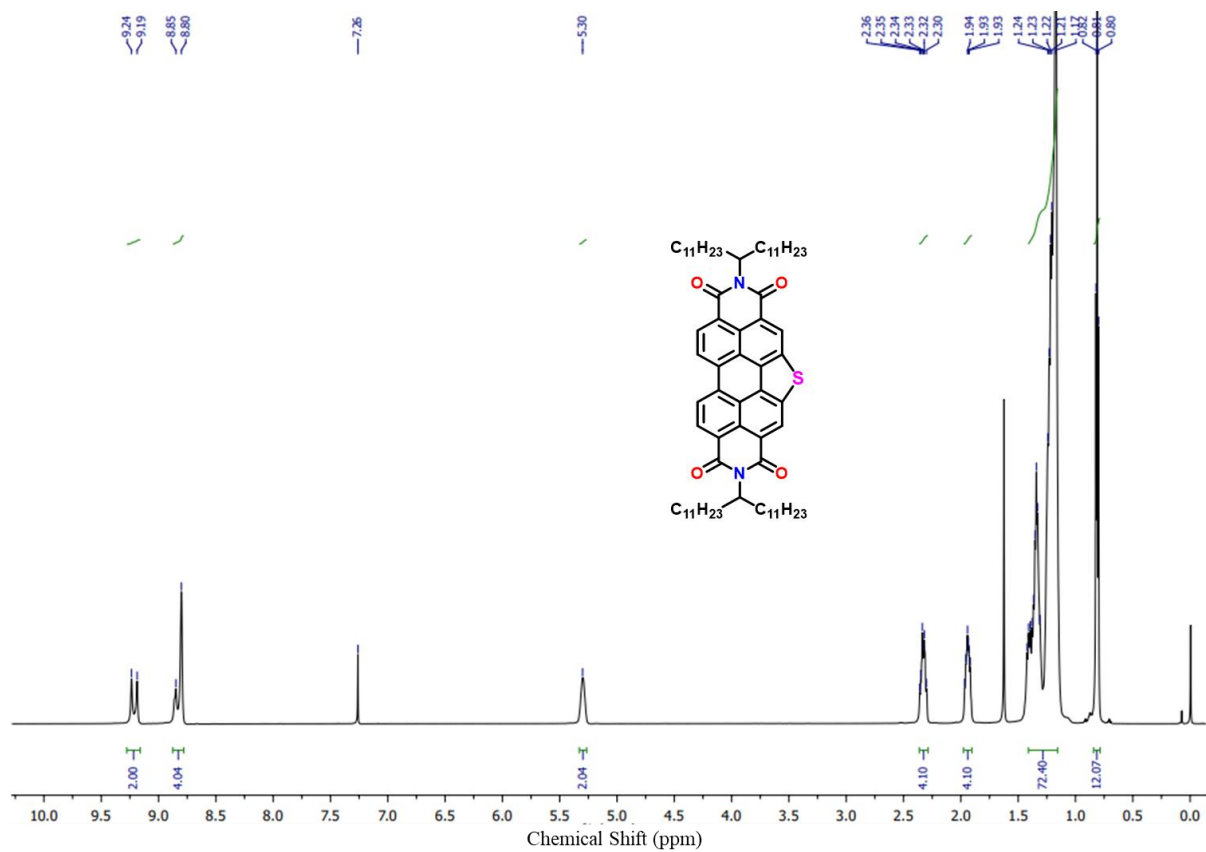

**Figure S3.**  $^1H$  NMR (600 MHz) spectra of **PBI-S<sup>ST</sup>** in  $CDCl_3$ .

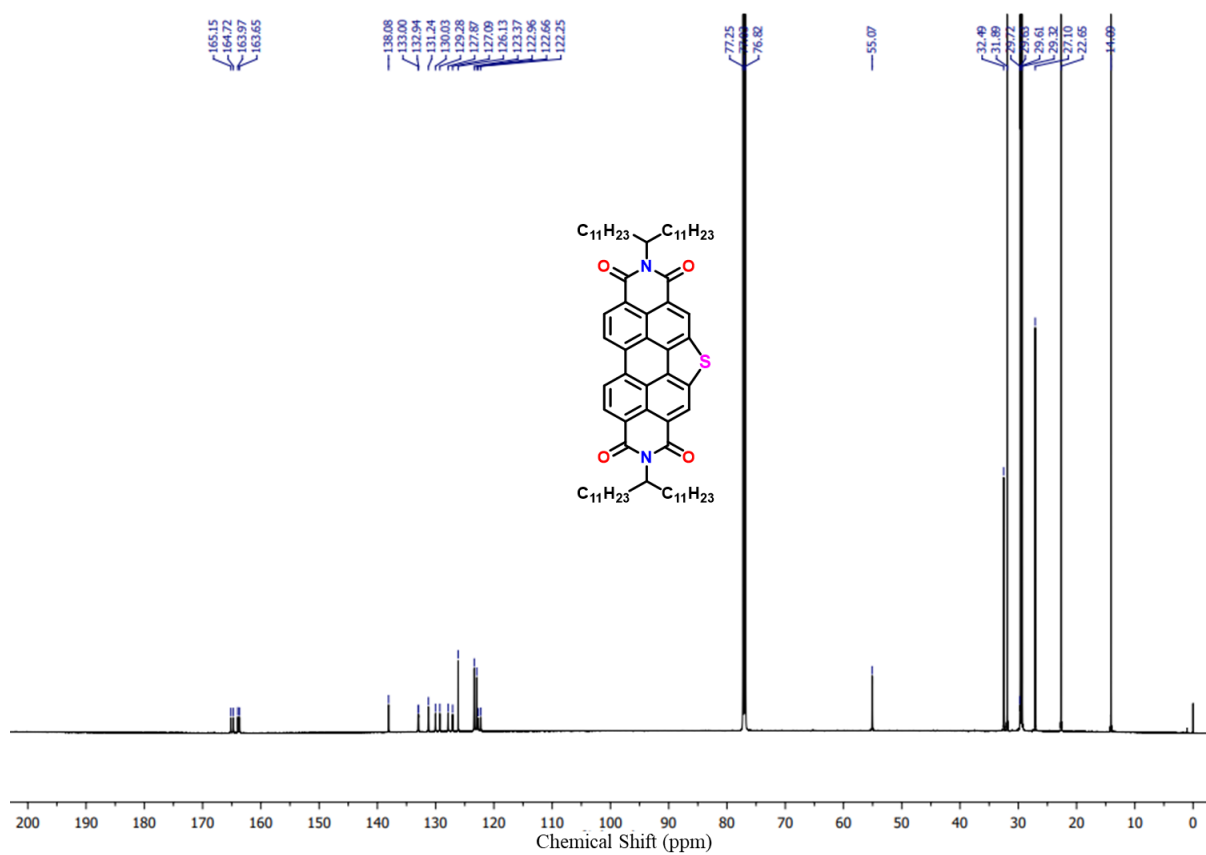

**Figure S4.**  $^{13}C$  NMR (150 MHz) spectra of **PBI-S<sup>ST</sup>** in  $CDCl_3$ .



#### 4. MALDI-TOF mass spectra

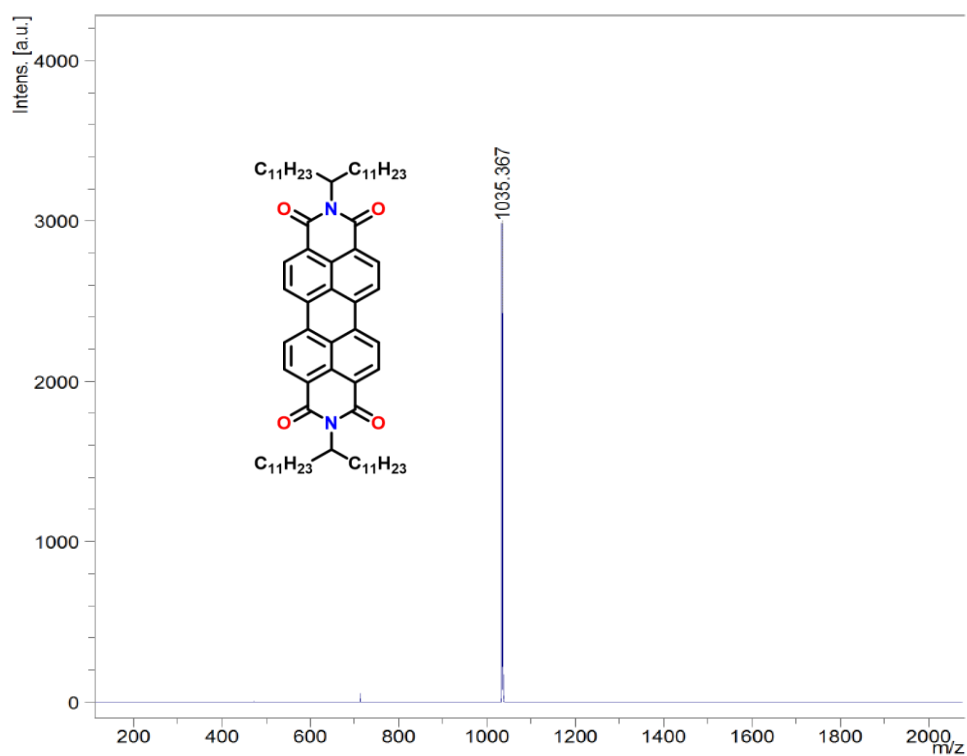

Figure S5. MALDI-TOF mass spectrum of PBI<sup>ST</sup>.

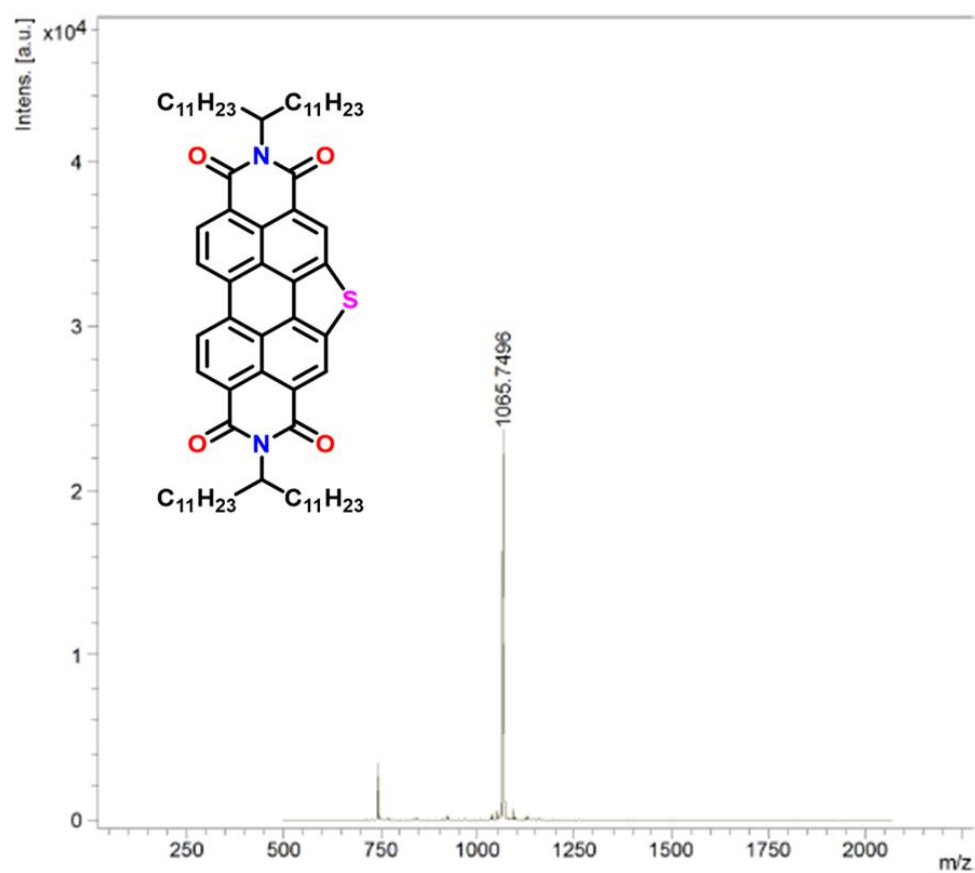

Figure S6. MALDI-TOF mass spectrum of PBI-S<sup>ST</sup>.

## 5. Thermogravimetric analysis (TGA)

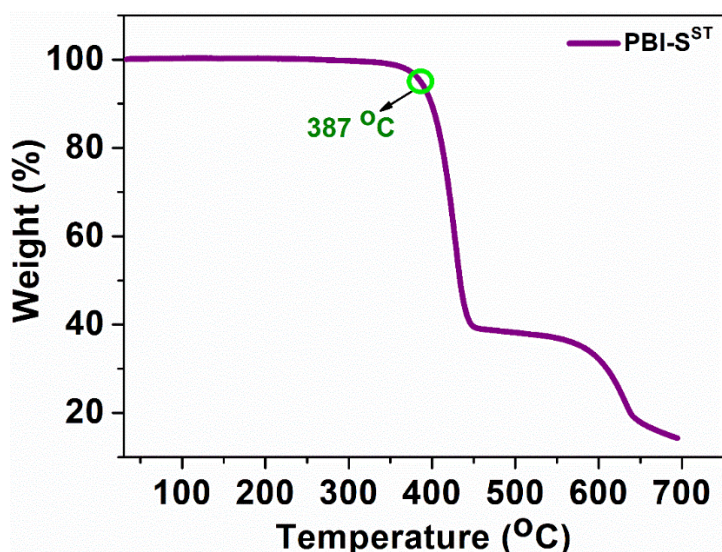

Figure S7. TGA plots of compound PBI-S<sup>ST</sup> (heating rate of 10 °C/min, Nitrogen atmosphere).

## 6. Differential scanning calorimetry (DSC)

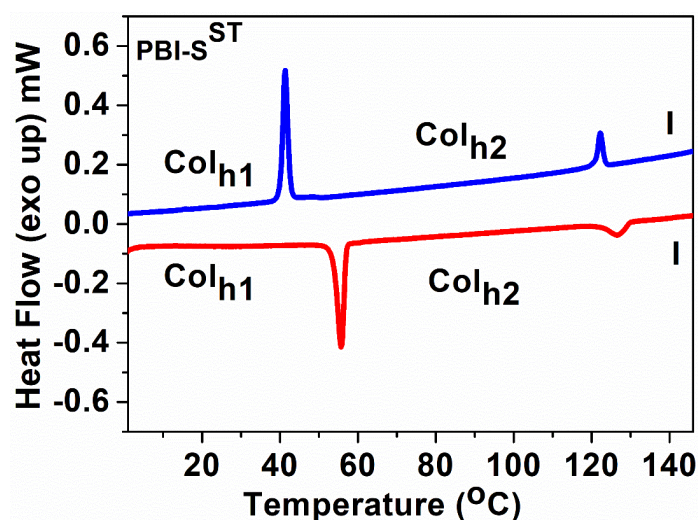

Figure S8. DSC thermogram of PBI-S<sup>ST</sup> at a rate 5 °C/min (Red trace: Second heating scan; Blue trace: First cooling scan).

Table S1. Phase transition temperatures (°C), corresponding enthalpies (kJmol<sup>-1</sup>)<sup>a</sup> and decomposition temperatures obtained for PBI-S<sup>ST</sup>.

| Compounds           | Phase Sequence (kJ/mol)           |                                   | T <sub>5</sub> <sup>b</sup> (°C) |
|---------------------|-----------------------------------|-----------------------------------|----------------------------------|
|                     | Second heating                    | First Cooling                     |                                  |
| PBI-S <sup>ST</sup> | Col <sub>h1</sub> 56.01 (5.22)    | I 122.04 (1.20) Col <sub>h2</sub> | 387                              |
|                     | Col <sub>h2</sub> 127.16 (0.93) I | 41.69 (5.11) Col <sub>h1</sub>    |                                  |

<sup>a</sup> Peak temperatures in the DSC thermograms obtained during the second heating and first cooling cycles at 5 °C min<sup>-1</sup>. Col<sub>h</sub> = Columnar hexagonal phase; I = Isotropic phase.

## 7. Polarized Optical Microscopy (POM) Images

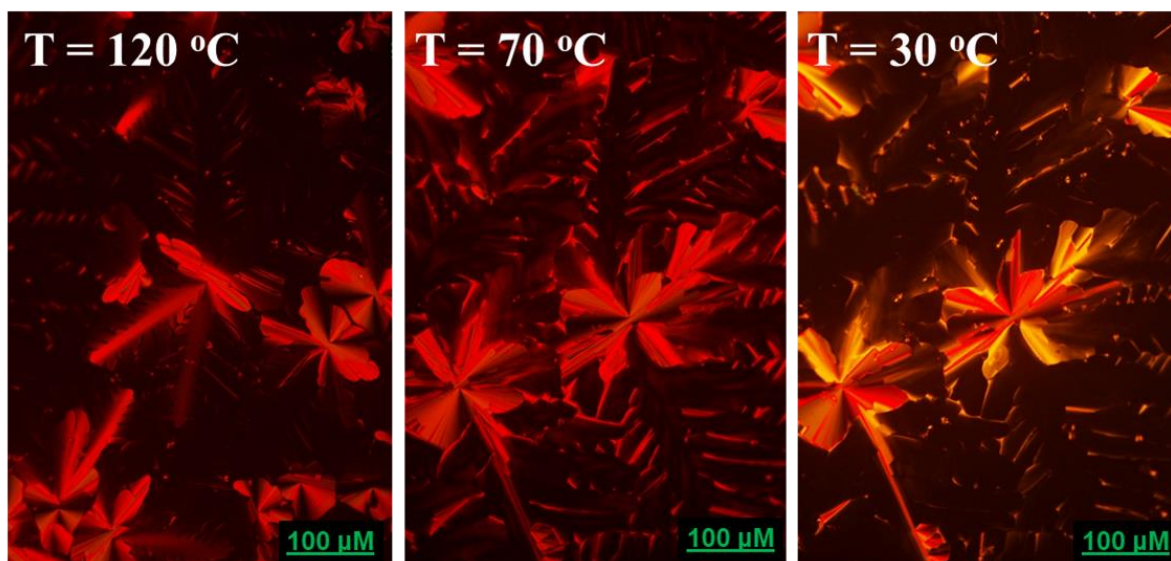

**Figure S9.** POM images obtained **PBI-S<sup>ST</sup>** at different temperatures (scale bar 100  $\mu\text{m}$ ).

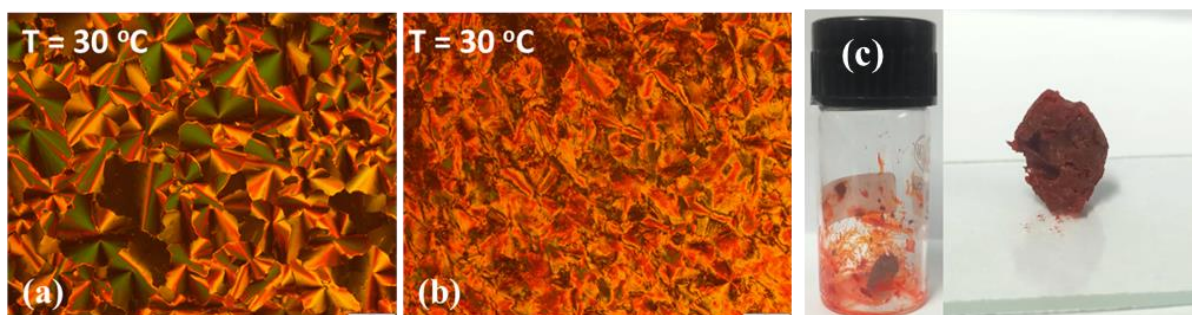

**Figure S10.** **PBI-S<sup>ST</sup>** in  $\text{Col}_{h1}$  phase at 30  $^{\circ}\text{C}$  before shearing (a); after shearing (b); Red gummy sticky appearance of **PBI-S<sup>ST</sup>** at room temperature (c).

## 8. X-ray Diffraction Studies (XRD)

**Table S2.** Results of  $(hkl)$  indexation of XRD profiles of **PBI-S<sup>ST</sup>** at a given temperatures (T) of mesophases<sup>a</sup>.

| Compounds (D/Å)                        | Phase (T/ $^{\circ}\text{C}$ ) | $d_{\text{obs}}$ (Å)                                        | $d_{\text{cal}}$ (Å)    | Miller indices $hk$ | Lattice parameters (Å), Lattice area S ( $\text{\AA}^2$ ), Molecular volume ( $\text{\AA}^3$ ) |
|----------------------------------------|--------------------------------|-------------------------------------------------------------|-------------------------|---------------------|------------------------------------------------------------------------------------------------|
| <b>PBI-S<sup>ST</sup></b><br>(37.86 Å) | $\text{Col}_h$<br>(100)        | 21.66<br>12.43<br>10.74<br>4.72 ( $h_a$ )<br>3.54 ( $h_c$ ) | 21.66<br>12.51<br>10.83 | 10<br>11<br>20      | $a = 25.01$<br>$c = 4.72$<br>$S = 541.69$<br>$V = 1917.61$<br>$Z \approx 1$                    |
|                                        | $\text{Col}_h$                 | 21.44<br>12.31<br>10.65                                     | 21.45<br>12.38<br>10.72 | 10<br>11<br>20      | $a = 24.76$<br>$c = 4.64$<br>$S = 530.92$                                                      |

|                                                                                                                                                                                                                                                                                                                                                                                                                                                                                                                                                                                                                        |                          |                                                    |                |          |                                                                             |
|------------------------------------------------------------------------------------------------------------------------------------------------------------------------------------------------------------------------------------------------------------------------------------------------------------------------------------------------------------------------------------------------------------------------------------------------------------------------------------------------------------------------------------------------------------------------------------------------------------------------|--------------------------|----------------------------------------------------|----------------|----------|-----------------------------------------------------------------------------|
| MW.:1065.69                                                                                                                                                                                                                                                                                                                                                                                                                                                                                                                                                                                                            | (60)                     | 4.64 ( $h_a$ )<br>3.52 ( $h_c$ )                   |                |          | $V = 1868.84$<br>$Z \approx 1$                                              |
|                                                                                                                                                                                                                                                                                                                                                                                                                                                                                                                                                                                                                        | Col <sub>h</sub><br>(28) | 23.18<br>13.31<br>4.83 ( $h_a$ )<br>4.01 ( $h_c$ ) | 23.18<br>13.38 | 10<br>11 | $a = 26.77$<br>$c = 4.83$<br>$S = 620.60$<br>$V = 2488.62$<br>$Z \approx 1$ |
| <sup>a</sup> The diameter (D) of the disk (estimated from Chem 3D Pro 22.2.0 molecular model software from Cambridge Soft). $d_{obs}$ : spacing observed; $d_{cal}$ : spacing calculated (deduced from the lattice parameters; $a$ for Col <sub>h</sub> phase; $c$ is height of the unit cell). The spacings marked $h_a$ and $h_c$ correspond to diffuse reflections in the wide-angle region arising from correlations between the alkyl chains and core regions, respectively. $Z$ indicates the number of molecules per columnar slice of thickness $h_c$ estimated from the lattice area $S$ and the volume $V$ . |                          |                                                    |                |          |                                                                             |

We have calculated the value of  $S$  to determine the value of  $Z$ , the number of molecules per unit cell. Regarding calculation of  $Z$ , we had used the widely employed formula mentioned below.<sup>S3</sup>

$$Z = \frac{\rho N_A V_{unit\ cell}}{M}$$

where  $\rho$  is the density of the liquid crystal phase, (1 g/cm<sup>3</sup>)

$N_A$  is Avogadro's constant, ( $6.022 \times 10^{23}$ )

$M$  is the molecular weight of the constitutive molecule.

$V$  is the Volume of hexagonal unit cell, which is calculated using the formula

$$V_{unit\ cell} = S \times h_c$$

Where  $h_c$  is the height of the columnar slice;

$S$  is the lattice area, calculated by the formula,

$$\begin{aligned} S &= a^2 \times \sin 60 \\ &= a^2 \times \sqrt{3}/2 \end{aligned}$$

Where  $a$  is hexagonal cell parameter or lattice parameter

$$\begin{aligned} a &= d_{100}/\cos 30 \\ a &= 2/\sqrt{3} \times d_{100} \end{aligned}$$

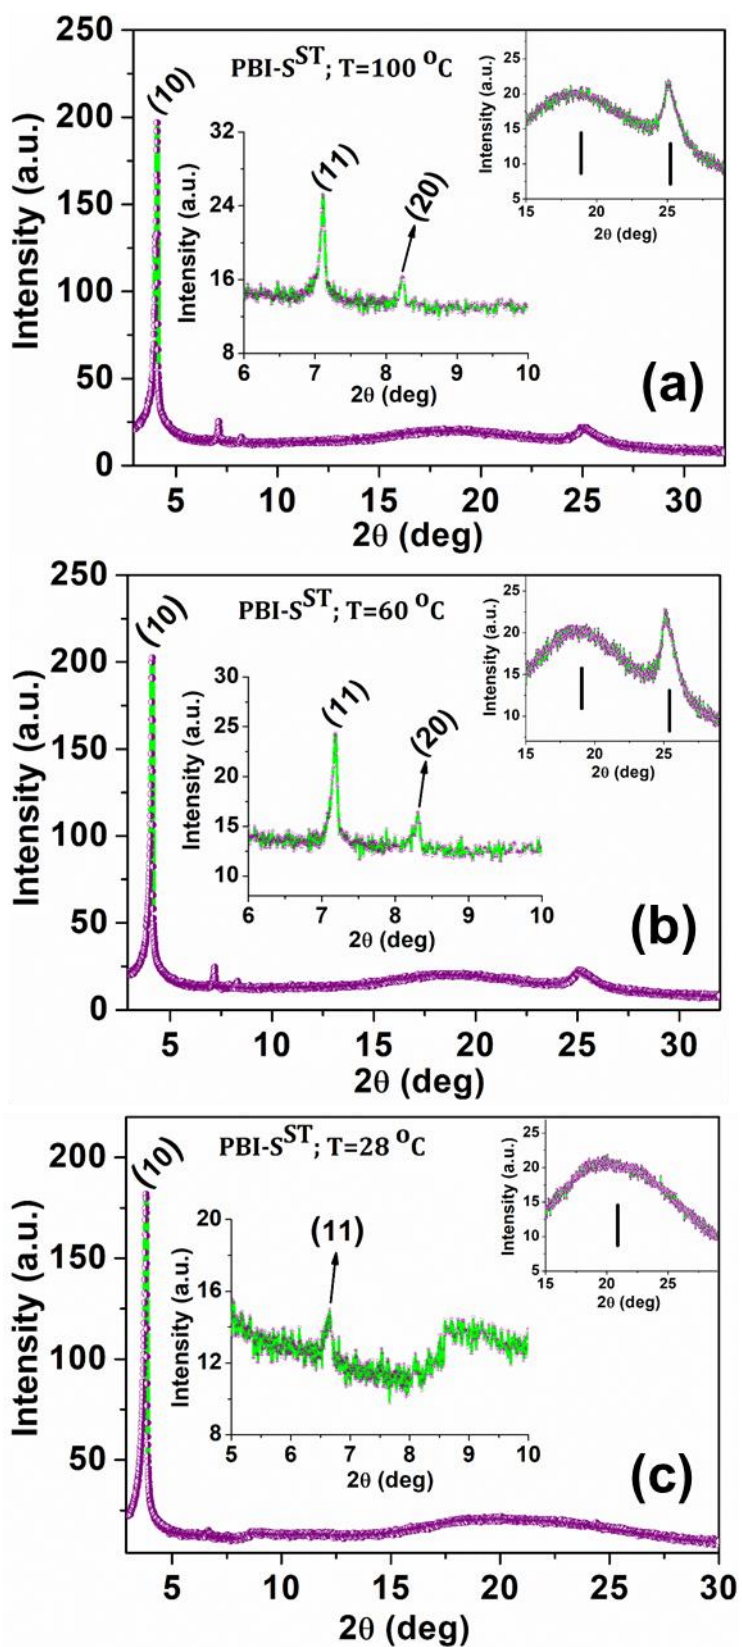

**Figure S11.** Plot of the intensity against  $2\theta$  obtained from the powder XRD pattern of the  $\text{Col}_h$  phases  $\text{PBI-S}^{\text{ST}}$  at  $100\text{ }^\circ\text{C}$  (a);  $60\text{ }^\circ\text{C}$  (b);  $28\text{ }^\circ\text{C}$  (c).

## 9. Photophysical studies

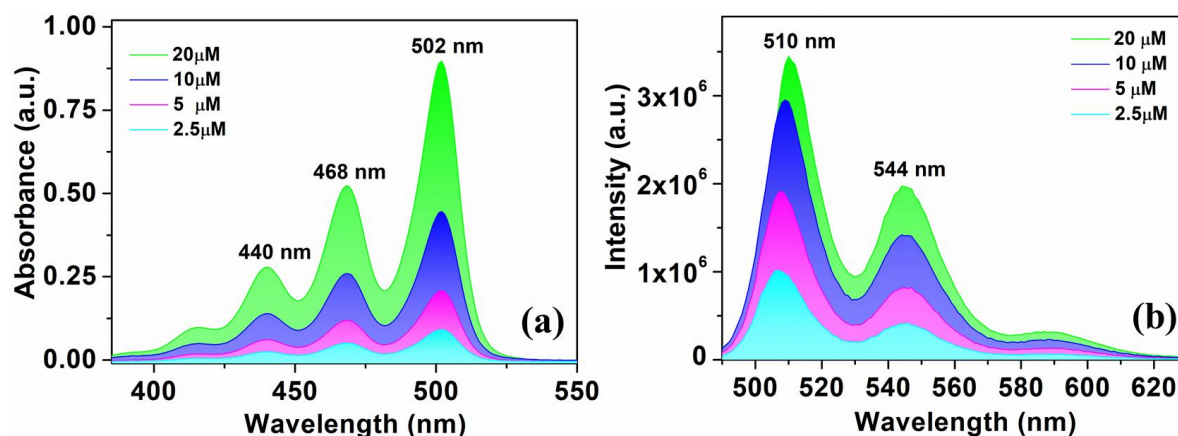

**Figure S12.** Absorption (a) emission (b) spectra of **PBI-S<sup>ST</sup>** in chloroform solution as a function of concentration.

**Table S3.** Photophysical properties of **PBI-S<sup>ST</sup>** in solution<sup>a</sup> and thin film<sup>b</sup> state.

| Entry                     | Absorption [nm]    | Emission <sup>c</sup> [nm] | Stokes Shift (cm <sup>-1</sup> ) | Molar extinction coefficient (ε) (L mol <sup>-1</sup> cm <sup>-1</sup> ) | Quantum yield <sup>d</sup> (Q <sub>S</sub> ) | ΔE <sub>g, opt</sub> <sup>f</sup> [eV] | Absorption [nm] | Emission <sup>g</sup> [nm] | Stokes Shift (cm <sup>-1</sup> ) |
|---------------------------|--------------------|----------------------------|----------------------------------|--------------------------------------------------------------------------|----------------------------------------------|----------------------------------------|-----------------|----------------------------|----------------------------------|
| <b>PBI-S<sup>ST</sup></b> | 413, 440, 468, 502 | 510, 544                   | 313                              | 45,000                                                                   | 0.74 <sup>d</sup><br>0.41 <sup>e</sup>       | 2.40                                   | 445, 478, 513   | 613                        | 4607                             |

<sup>a</sup> Micromolar solution in CHCl<sub>3</sub>. <sup>b</sup> Prepared by drop casting of millimolar solution in toluene. <sup>c</sup> The excitation wavelength λ<sub>ex</sub> = 502 nm for **PBI-S<sup>ST</sup>**. <sup>d</sup> Relative quantum yields are calculated with respect to Rhodamine-6G (λ<sub>ex</sub> = 530 nm) in ethanol solution as the standard and compounds in CHCl<sub>3</sub>. <sup>e</sup> Absolute quantum yield in the thin film state. <sup>f</sup> Calculated from the red edge of the absorption band. <sup>g</sup> Excited at the absorption maxima.

## 10. Quantum yield measurement (Relative)

Quantum yield was measured according to established procedure by using rhodamine 6g in ethanol as the standard. Absolute values were calculated according to the following equation:  $Q_S = Q_R \times (m_S / m_R) \times (n_S / n_R)^2$ , Where, Q: Quantum yield, m: Slope of the plot of integrated fluorescence intensity vs absorbance (Calculated from Fig.S11), n: refractive index (1.361 for ethanol and 1.445 for chloroform). The subscript R refers to the reference fluorophore i.e. rhodamine 6G solution in EtOH and subscript S refers to the sample under investigation. In order to minimize re-absorption effects, absorbance was kept below 0.15 at the excitation wavelength of 502 nm for compounds **PBI-S<sup>ST</sup>**. Quantum Yield of rhodamine 6g in EtOH is 0.95. Simplified equation for the calculation after substituting the appropriate values is given below and values obtained are given in table below.

$$Q_S = 0.95 \times (m_S / m_R) \times (1.445/1.361)^2$$

| Compounds                 | m <sub>S</sub>            | m <sub>R</sub>            | Q <sub>S</sub> <sup>a,b,c</sup> |
|---------------------------|---------------------------|---------------------------|---------------------------------|
| <b>PBI-S<sup>ST</sup></b> | 6.37322 × 10 <sup>8</sup> | 9.53557 × 10 <sup>8</sup> | 0.74                            |

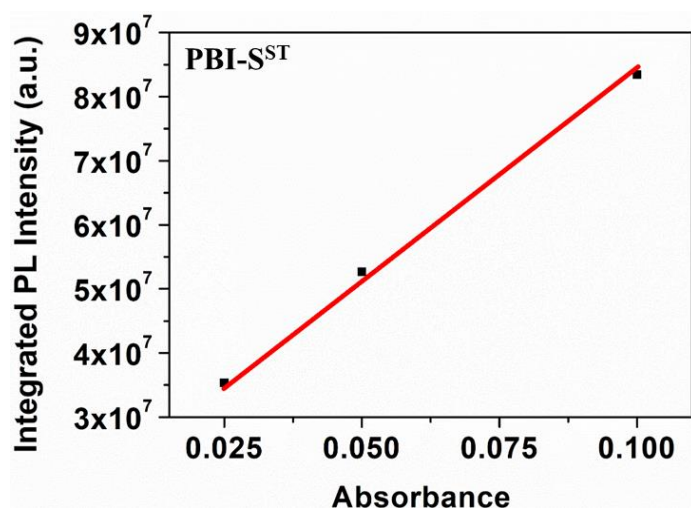

Figure S13. Plots of integrated photoluminescence intensity vs absorbance of compound **PBI-S<sup>ST</sup>**.

## 11. Cyclic voltammetry (CV)

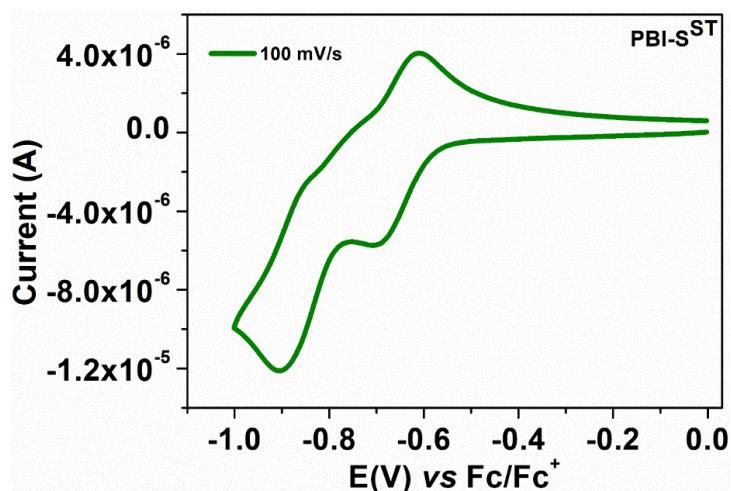

Figure S14. Cyclic voltammograms of **PBI-S<sup>ST</sup>**.

Table S4. Electrochemical<sup>a,b</sup> data and data obtained from DFT<sup>h</sup> calculations for compounds **PBI-S<sup>ST</sup>**.

| Entry                     | Electrochemical data |                    |                    |                              | Data from DFT calculations |                    |                           |
|---------------------------|----------------------|--------------------|--------------------|------------------------------|----------------------------|--------------------|---------------------------|
|                           | $E_{1st\ red}^{[c]}$ | $E_{LUMO}^{[d,e]}$ | $E_{HOMO}^{[d,f]}$ | $\Delta E_{g,\ opt}^{[d,g]}$ | $E_{LUMO}^{[d,h]}$         | $E_{HOMO}^{[d,h]}$ | $\Delta E_{g,\ }^{[d,h]}$ |
| <b>PBI-S<sup>ST</sup></b> | -0.70                | -3.57              | -5.97              | 2.40                         | -3.39                      | -6.09              | 2.70                      |

<sup>[a]</sup>0.5 mM Dichloromethane solutions; <sup>[b]</sup>experimental conditions: Ag/AgNO<sub>3</sub> as reference electrode, glassy carbon working electrode, platinum wire counter electrode, TBAP (0.1M) as a supporting electrolyte, room temperature; <sup>[c]</sup> in volts (V); <sup>[d]</sup> in eV; <sup>[e]</sup> estimated from the formula by using  $E_{LUMO} = -(4.8 - E_{1/2, Fc/Fc^+} + E_{red, onset})$  eV; <sup>[f]</sup> estimated from the formula  $E_{HOMO} = (E_{LUMO} - E_{g,\ opt})$  eV;  $E_{1/2, Fc/Fc^+} = 0.50$  V. <sup>[g]</sup>calculated from the red edge of the absorption band of each compound. <sup>[h]</sup> Obtained from DFT calculations by employing the combination of Becke3-Lee-Yang-Parr (B3LYP) hybrid functional and 6-31G(d,p) basis set using the Gaussian 09 package.

## 12. Device Fabrication and Characterizations

Based on superior photophysical and electrochemical properties, the electroluminescent properties of **PBI-S<sup>ST</sup>** emitter material, was investigated. Multi-layered solution processed OLED was fabricated consisting of following device configurations: anode: ITO (125 nm)/HIL: PEDOT:PSS (40 nm)/ EML (20 nm)/ ETL: TPBi (35 nm)/EIL: LiF (1 nm)/cathode: Al (100 nm). Initially, ITO-coated glass substrates were cleaned to remove greasy layer. The cleaning process was carried-out with soap-solution, deionized water, acetone, and alcohol in water-bath sonicator at optimized time. Cleaned substrates were kept in ultra-violet ozone system to expose in UV-light for removing residual solvents and further impurities. Then, these substrates were transferred into nitrogen purged glovebox for further processing of layers. Simultaneously, CBP as host and newly synthesized emitter (**PBI-S<sup>ST</sup>**) for emissive solution layer was dispersed into suitable solvents with water-bath sonicator. Prepared solution was filtered with 0.45  $\mu\text{m}$  PTFE filters and mixed in desired ratio to prepare emissive layer. First, a hole-injection layer was prepared by spin-coating an aqueous solution of PEDOT:PSS at 4,000 rpm for 20 s. Subsequently, these substrates were annealed at 130 °C for 15 minutes. After cooled down the substrates, neat solution or emissive layer solution was spin-coated onto hole-injection layer at 2,500 rpm for 20 s. Then, these substrates were transferred into thermal evaporator to deposit subsequent layers. Then, TPBi was deposited as an electron-transport layer followed by the deposition of 0.5 nm LiF as an electron-injection layer and 100 nm Al as a cathode. All the layers of TPBi, LiF and Al were deposited subsequently via thermal evaporation method at base pressure of  $4.0 \times 10^{-6}$  Torr. After that, Fabricated devices were kept in the mini vacuum chamber during testing process and then measured at room temperature conditions. To analyse the device, the electroluminescence (EL) spectrum, luminance, and the CIE coordinates were obtained using a photo research (PR-655) spectrometer. The current density-voltage-luminance (J-V-L) characteristics were obtained by a computer mounted voltmeter (Keithley 2400) and spectrophotometer CS-100 Minolta.



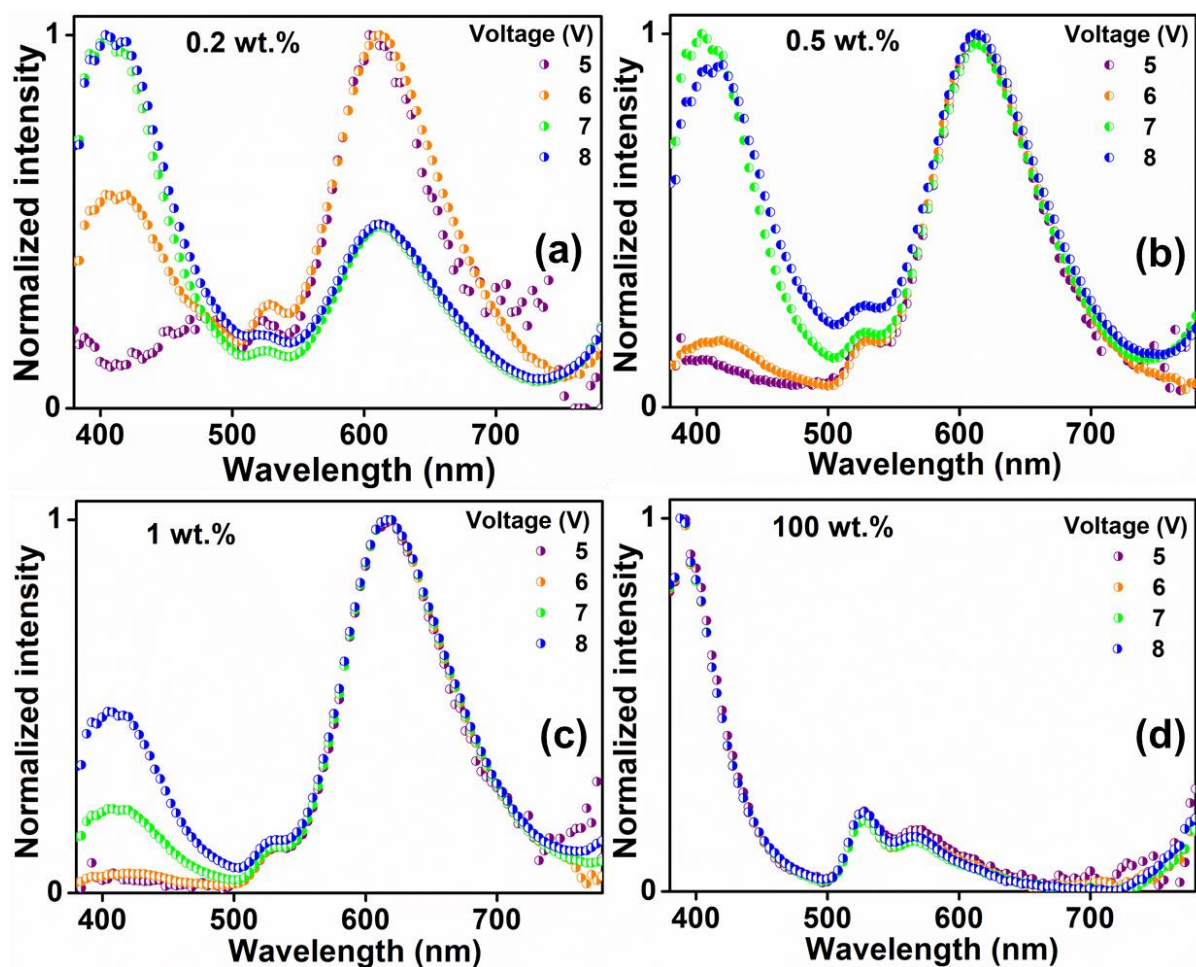

**Figure S15.** The electroluminescent spectra of PBI-S<sup>ST</sup> at a varying voltage of the doped devices at varying concentrations (a) 0.2, (b) 0.5 and (c) 1.0 wt% in the CBP host matrix, along with the (d) undoped (100 wt%) device.

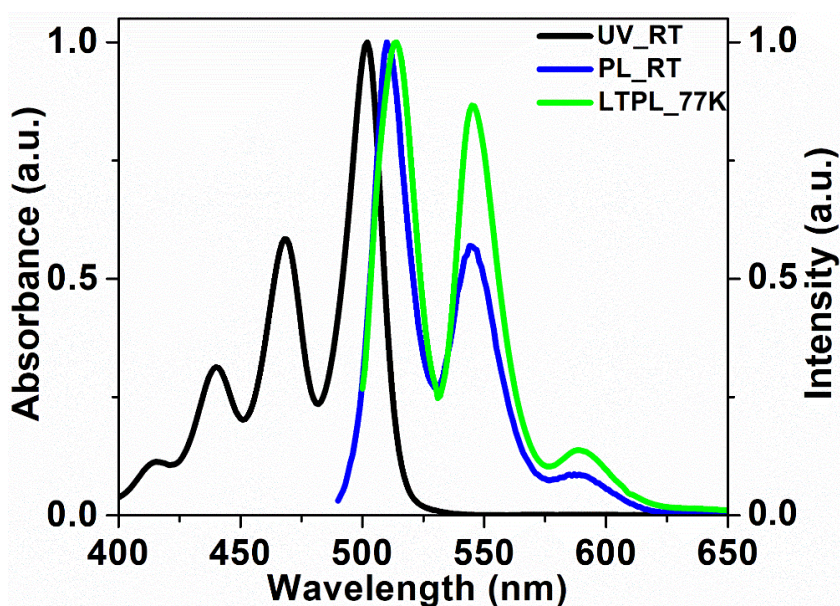

**Figure S16.** Overlay of absorbance, photoluminescence, low temperature photoluminescence spectra of PBI-S<sup>ST</sup> in solution state.

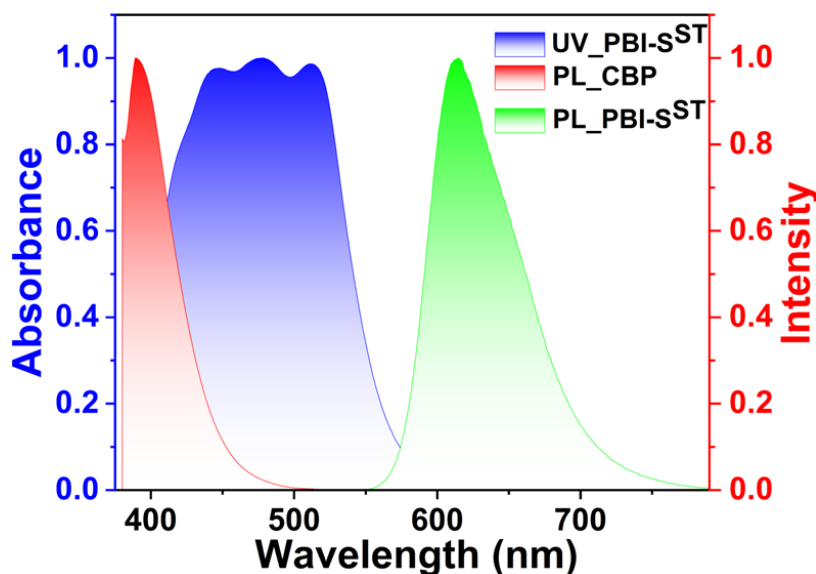

**Figure S17.** Overlay of absorbance and emission spectra of **PBI-S<sup>ST</sup>** and photoluminescence spectra of **CBP** in thin film state

**Table S5.** Solid state PLQY values of **PBI-S<sup>ST</sup>** and in its doped state with CBP at 0.5 wt%.

| Compound                            | PLQY |
|-------------------------------------|------|
| <b>PBI-S<sup>ST</sup></b> (0.5 wt%) | 79 % |
| <b>PBI-S<sup>ST</sup></b> (100 wt%) | 41 % |

### 13. Surface Morphology Studies (AFM)

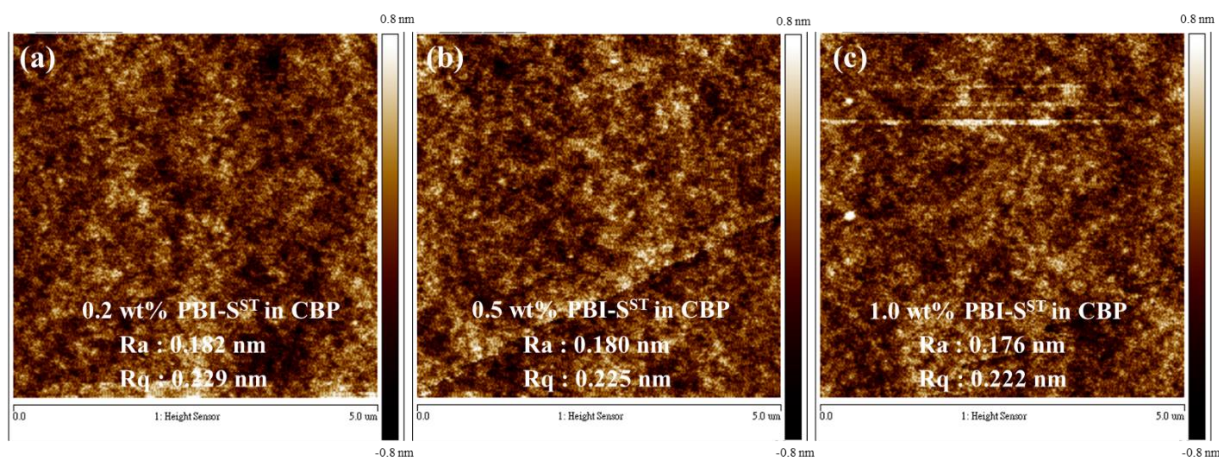

**Figure S18.** AFM images or the surface morphologies of 0.2 wt% (a), 0.5 wt% (b), and 1.0 wt% (c) of **PBI-S<sup>ST</sup>** emitter doped in CBP host matrix.

### 14. DFT Studies

To understand the electronic properties and frontier molecular orbital energy level of compounds **PBI-S<sup>ST</sup>** computational studies was carried out in B3LYP/6-31g(d,p) method using Gaussian 09 program package.<sup>S4</sup> The absence of imaginary frequency ensured the energy minimized structure of all the compounds.

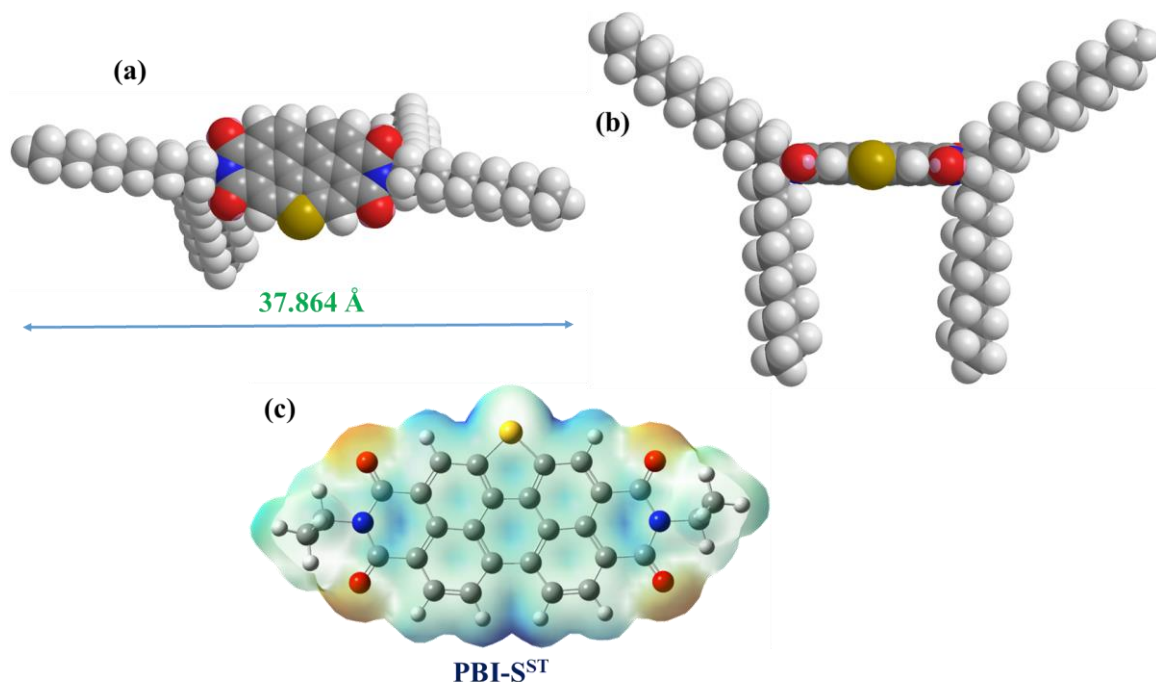

**Figure S19.** Energy minimized molecular model of **PBI-S<sup>ST</sup>** (a) top view; (b) side view; (c) 3D molecular electrostatic potential contour map of optimized structure of **PBI-S<sup>ST</sup>** (In the mapped electrostatic potential surface, the red and blue colors refer to the electron-rich and electron-poor regions, respectively, whereas the green color signifies the zero electrostatic potential, chain length is limited to methyl for clarity purpose).

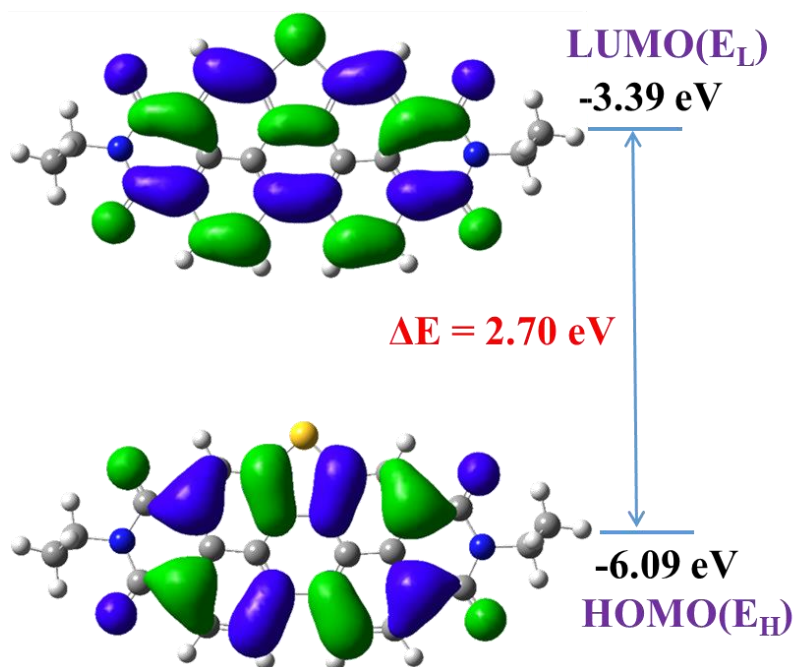

**Figure S20.** Frontier molecular orbitals of **PBI-S<sup>ST</sup>** obtained from tricosan-12-amine. DFT calculations at the B3LYP/6-31G(dp) level.  $E_H$  and  $E_L$  denote energies of the highest occupied molecular orbital (HOMO) and the lowest unoccupied molecular orbital (LUMO), respectively (chain length is limited to methyl for clarity purpose).

**DFT calculation data for PBI-S<sup>ST</sup>:**

| Center Number | Atomic Number | Atomic Type | Coordinates (Angstroms) |           |           |
|---------------|---------------|-------------|-------------------------|-----------|-----------|
|               |               |             | X                       | Y         | Z         |
| 1             | 6             | 0           | 2.765672                | 2.717958  | -0.001709 |
| 2             | 6             | 0           | 1.404994                | 2.771360  | -0.002433 |
| 3             | 6             | 0           | 0.645846                | 1.635339  | -0.002380 |
| 4             | 6             | 0           | 1.381030                | 0.472502  | -0.001850 |
| 5             | 6             | 0           | 2.745948                | 0.371181  | -0.001220 |
| 6             | 6             | 0           | 3.453551                | 1.537619  | -0.000958 |
| 7             | 6             | 0           | 0.703166                | -0.695977 | -0.001984 |
| 8             | 6             | 0           | 1.229062                | -1.946722 | -0.001871 |
| 9             | 6             | 0           | 2.593397                | -2.018183 | -0.001480 |
| 10            | 6             | 0           | 3.342620                | -0.870794 | -0.001051 |
| 11            | 6             | 0           | -0.747196               | 1.586081  | -0.002556 |
| 12            | 6             | 0           | -1.398337               | 0.374168  | -0.002214 |
| 13            | 6             | 0           | -0.639548               | -0.743419 | -0.002143 |
| 14            | 6             | 0           | -1.584320               | 2.666043  | -0.003038 |
| 15            | 6             | 0           | -2.937798               | 2.516684  | -0.002855 |
| 16            | 6             | 0           | -3.539615               | 1.290479  | -0.002122 |
| 17            | 6             | 0           | -2.752576               | 0.176185  | -0.001736 |
| 18            | 6             | 0           | -3.261393               | -1.104449 | -0.001403 |
| 19            | 6             | 0           | -2.432032               | -2.195490 | -0.001785 |
| 20            | 6             | 0           | -1.076111               | -2.028030 | -0.001982 |
| 21            | 6             | 0           | 4.736028                | -0.955666 | -0.000314 |
| 22            | 7             | 0           | 5.446873                | 0.249225  | 0.002212  |
| 23            | 6             | 0           | 4.846937                | 1.514942  | 0.000071  |
| 24            | 6             | 0           | -4.927459               | 1.169003  | -0.001490 |
| 25            | 7             | 0           | -5.438769               | -0.132320 | 0.002602  |
| 26            | 6             | 0           | -4.645741               | -1.288062 | -0.000560 |
| 27            | 8             | 0           | 5.511269                | 2.537397  | -0.000672 |
| 28            | 8             | 0           | 5.319240                | -2.025967 | -0.001731 |
| 29            | 8             | 0           | -5.665011               | 2.138977  | -0.004218 |
| 30            | 8             | 0           | -5.148185               | -2.399387 | -0.002022 |
| 31            | 6             | 0           | 6.927160                | 0.183484  | 0.006556  |
| 32            | 6             | 0           | -6.911008               | -0.299645 | 0.008825  |
| 33            | 6             | 0           | 7.507155                | -0.443451 | 1.287143  |
| 34            | 6             | 0           | 7.513950                | -0.431546 | -1.276657 |
| 35            | 6             | 0           | -7.580713               | 0.234142  | 1.288003  |
| 36            | 6             | 0           | -7.586719               | 0.213223  | -1.275383 |
| 37            | 6             | 0           | 0.112273                | -3.000744 | -0.002104 |
| 38            | 1             | 0           | 3.295367                | 3.680439  | -0.001771 |
| 39            | 1             | 0           | 0.949308                | 3.769542  | -0.002974 |
| 40            | 1             | 0           | 3.056350                | -3.014371 | -0.001198 |
| 41            | 1             | 0           | -1.200308               | 3.693882  | -0.003416 |
| 42            | 1             | 0           | -3.535325               | 3.438699  | -0.003186 |
| 43            | 1             | 0           | -2.821907               | -3.222425 | -0.001498 |
| 44            | 1             | 0           | 7.354561                | 1.209948  | 0.013433  |
| 45            | 1             | 0           | -7.174164               | -1.379835 | 0.020181  |
| 46            | 1             | 0           | 8.607812                | -0.307720 | 1.328984  |
| 47            | 1             | 0           | 7.075804                | 0.037909  | 2.189399  |
| 48            | 1             | 0           | 7.321806                | -1.531363 | 1.364565  |
| 49            | 1             | 0           | 8.615348                | -0.299749 | -1.309159 |
| 50            | 1             | 0           | 7.091042                | 0.061496  | -2.176504 |
| 51            | 1             | 0           | 7.323972                | -1.517686 | -1.366979 |
| 52            | 1             | 0           | -8.646587               | -0.071533 | 1.331955  |
| 53            | 1             | 0           | -7.078871               | -0.170449 | 2.191451  |
| 54            | 1             | 0           | -7.567385               | 1.337988  | 1.360970  |
| 55            | 1             | 0           | -8.654748               | -0.086473 | -1.305952 |

|    |   |   |           |           |           |
|----|---|---|-----------|-----------|-----------|
| 56 | 1 | 0 | -7.093679 | -0.211999 | -2.174246 |
| 57 | 1 | 0 | -7.565714 | 1.315370  | -1.369486 |

## 15. TD-DFT and NTO calculations:

Excited states were calculated by time-dependent DFT (TD-DFT) calculations the using the ground state optimized geometries.

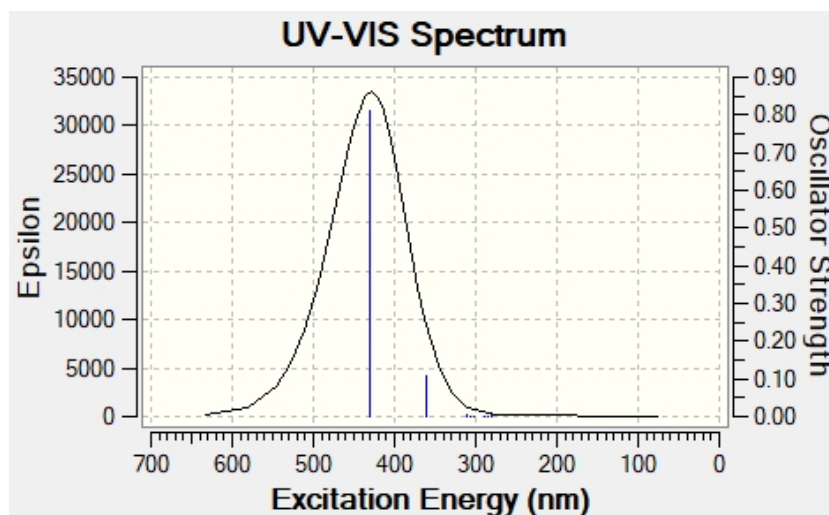

**Figure S21.** TD-DFT simulated UV-vis absorption spectra of compound **PBI-S<sup>ST</sup>** (no. of states considered =40).

The singlet energy ( $E_S$ ) of material **PBI-S<sup>ST</sup>** calculated from the fluorescence spectra (at room temperature) is found to be 2.45 eV (calculated from emission maxima (recorded in THF)) while  $E_S = 2.88$  eV has been estimated from TD-DFT calculation.

No phosphorescent spectrum of **PBI-S<sup>ST</sup>** is observed (Figure S16) (as performed in THF at 77 K) which is indicative of low density of the  $T_1$  state in **PBI-S<sup>ST</sup>**. The similar fact has been reported in the literature.<sup>S5</sup> While from TD-DFT the calculated triplet energy of the  $T_1$  state is  $E_T = 1.28$  eV.

**Table S6.** Calculated natural transition orbitals (NTO) of singlet and triplet excited states.

| Excited states (Energies) | Hole                                                                                | Contribution | Particle                                                                             | Contribution |
|---------------------------|-------------------------------------------------------------------------------------|--------------|--------------------------------------------------------------------------------------|--------------|
| S <sub>1</sub> (2.883 eV) | 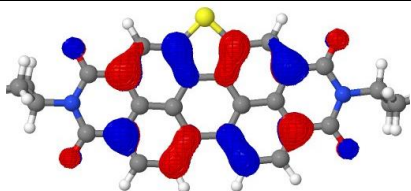 | 0.98         |  | 0.98         |

|                                    |                                                                                     |      |                                                                                      |      |
|------------------------------------|-------------------------------------------------------------------------------------|------|--------------------------------------------------------------------------------------|------|
| <b>S<sub>2</sub></b><br>(3.436 eV) | 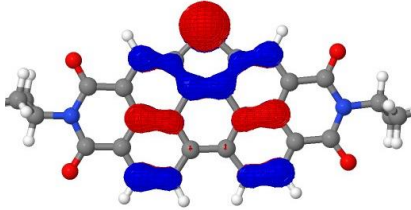   | 0.90 |    | 0.90 |
| <b>S<sub>3</sub></b><br>(3.994 eV) |    | 0.87 |    | 0.87 |
| <b>S<sub>4</sub></b><br>(4.045 eV) |    | 0.74 |    | 0.74 |
| <b>S<sub>5</sub></b><br>(4.050 eV) |   | 0.74 |   | 0.74 |
| <b>S<sub>6</sub></b><br>(4.106 eV) |  | 0.49 |  | 0.49 |
|                                    |  | 0.43 |  | 0.43 |
| <b>S<sub>7</sub></b><br>(4.277 eV) |  | 0.74 |  | 0.74 |
| <b>S<sub>8</sub></b><br>(4.281 eV) |  | 0.74 |  | 0.74 |
| <b>S<sub>9</sub></b><br>(4.342 eV) |  | 0.76 |  | 0.76 |

|                                     |                                                                                     |                                |                                                                                      |                                |
|-------------------------------------|-------------------------------------------------------------------------------------|--------------------------------|--------------------------------------------------------------------------------------|--------------------------------|
|                                     | 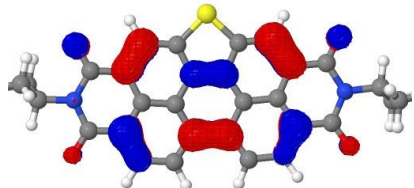   | 0.20                           |    | 0.20                           |
| <b>S<sub>10</sub></b><br>(4.437 eV) |    | 0.55                           |    | 0.55                           |
|                                     |    | 0.39                           |    | 0.39                           |
| <b>Excited states</b><br>(Energies) | <b>Hole</b>                                                                         | <b>Contri</b><br><b>bution</b> | <b>Particle</b>                                                                      | <b>Contri</b><br><b>bution</b> |
| <b>T<sub>1</sub></b><br>(1.283 eV)  |   | 0.96                           |   | 0.96                           |
| <b>T<sub>2</sub></b><br>(2.756 eV)  |  | 0.94                           |  | 0.94                           |
| <b>T<sub>3</sub></b><br>(2.771 eV)  |  | 0.47                           |  | 0.47                           |
|                                     |  | 0.41                           |  | 0.41                           |
| <b>T<sub>4</sub></b><br>(2.946 eV)  |  | 0.48                           |  | 0.48                           |

|                                     |                                                                                     |      |                                                                                      |      |
|-------------------------------------|-------------------------------------------------------------------------------------|------|--------------------------------------------------------------------------------------|------|
|                                     | 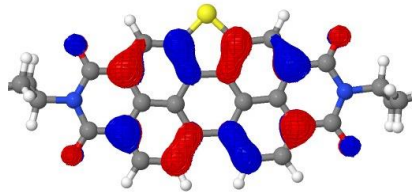   | 0.42 |    | 0.42 |
| <b>T<sub>5</sub></b><br>(3.455 eV)  |    | 0.76 |    | 0.76 |
| <b>T<sub>6</sub></b><br>(3.692 eV)  |    | 0.85 |    | 0.85 |
| <b>T<sub>7</sub></b><br>(3.699 eV)  |    | 0.84 |    | 0.84 |
| <b>T<sub>8</sub></b><br>(3.731 eV)  |  | 0.61 |  | 0.61 |
|                                     |  | 0.24 |  | 0.24 |
| <b>T<sub>9</sub></b><br>(3.787 eV)  |  | 0.71 |  | 0.71 |
|                                     |  | 0.23 |  | 0.23 |
| <b>T<sub>10</sub></b><br>(3.931 eV) |  | 0.80 |  | 0.80 |



## 16. Electron-hole correlation plots for the individual states:

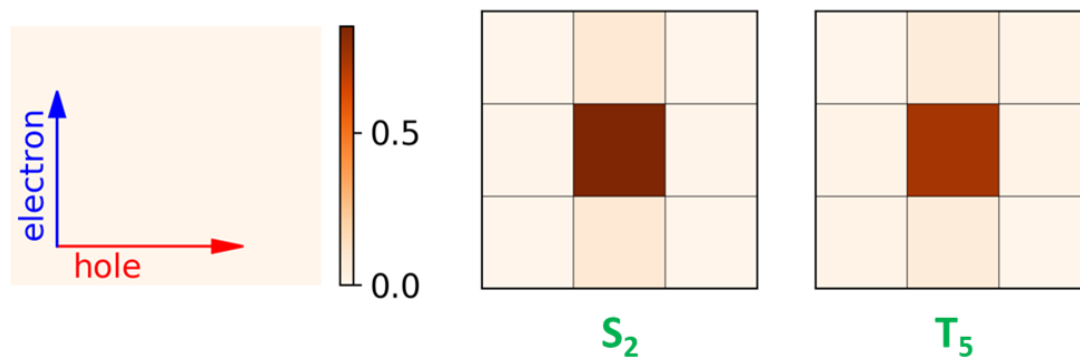

**Figure S22.** Electron-hole correlation plots of  $S_2$  and  $T_5$  states of compound **PBI-S<sup>ST</sup>**.

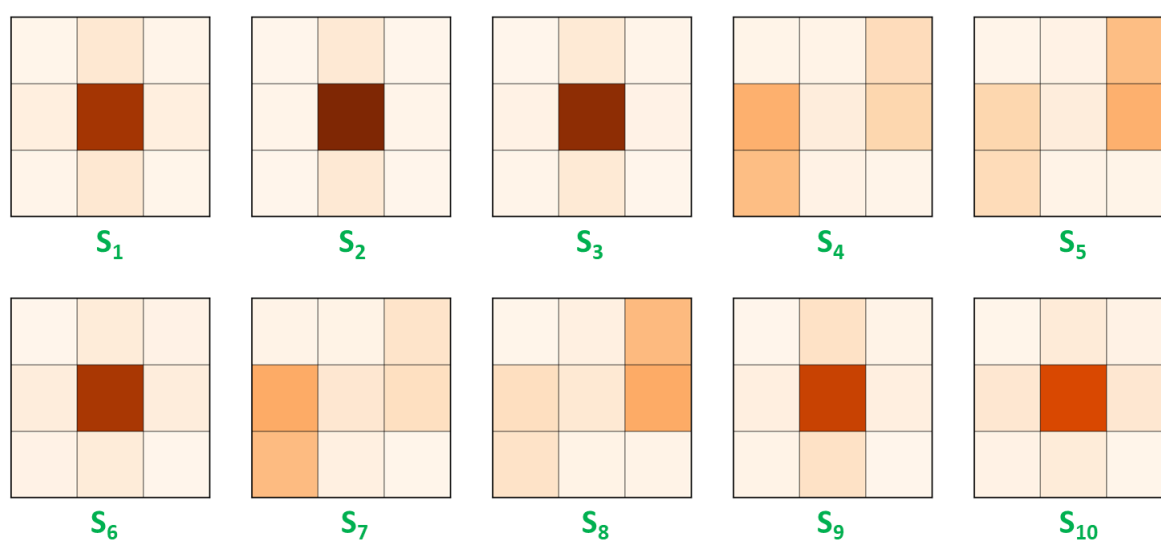

**Figure S23.** Electron-hole correlation plots of  $S_1$ -  $S_{10}$  states of compound **PBI-S<sup>ST</sup>**.

From the above figure it is clear that  $S_1, S_2, S_3, S_6, S_9,$  and  $S_{10}$  are local excited states with very less charge transfer characteristics while  $S_4, S_5, S_7,$  and  $S_8$  shows a dominant charge transfer characteristic.

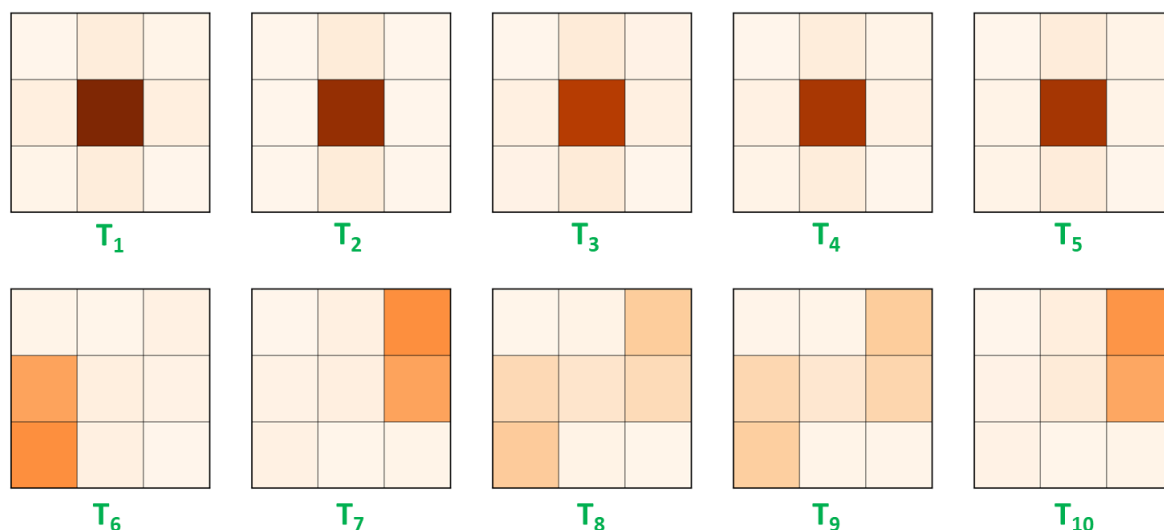

**Figure S24.** Electron-hole correlation plots of  $T_1$ -  $T_{10}$  states of compound **PBI-S<sup>ST</sup>**.

From the above figure it is clear that  $T_1$ ,  $T_2$ ,  $T_3$ ,  $T_4$ , and  $T_5$  are local excited states with very less charge transfer characteristics while  $T_6$ ,  $T_7$ ,  $T_8$ ,  $T_9$  and  $T_{10}$  shows a dominant charge transfer characteristics.

## 17. Solvatochromism

To further investigate the HLCT character of **PBI-S<sup>ST</sup>** we examined its solvatochromism behavior. This involved measuring the absorption (Fig. S25a) and emission (Fig. S25b) spectra in a diverse range of solvents, spanning from non-polar to polar solvents as depicted in Figure S25. It is crucial to note that during our experimental investigations, we encountered challenges in measuring emission spectra in highly polar solvents such as ethanol, DMF, DMSO, methanol, acetone, water, and acetonitrile, as **PBI-S<sup>ST</sup>** exhibited insolubility in these mediums. Despite these challenges, **PBI-S<sup>ST</sup>** exhibited a complex solvatochromic behavior, consistent with existing literature reports.<sup>S6</sup> From the above experiments we observed a red shift in both absorption and emission spectra with increase in solvent polarity from hexane to chloroform. This shift strongly implies the presence of a charge transfer (CT) excited state in **PBI-S<sup>ST</sup>**.<sup>S7-S9</sup> Furthermore, it is well-established in literature that locally excited states of PBI derivatives typically exhibit high photoluminescence quantum yield (PLQY) values, attributed to their large transition dipole moment and nearly complete orbital overlap.<sup>S8,S9</sup> The **PBI-S<sup>ST</sup>** compound, specifically in chloroform, demonstrated an impressive PLQY of 88%, underscoring the highly emissive nature of the Hybridized Locally Excited and Charge Transfer (HLCT) state.

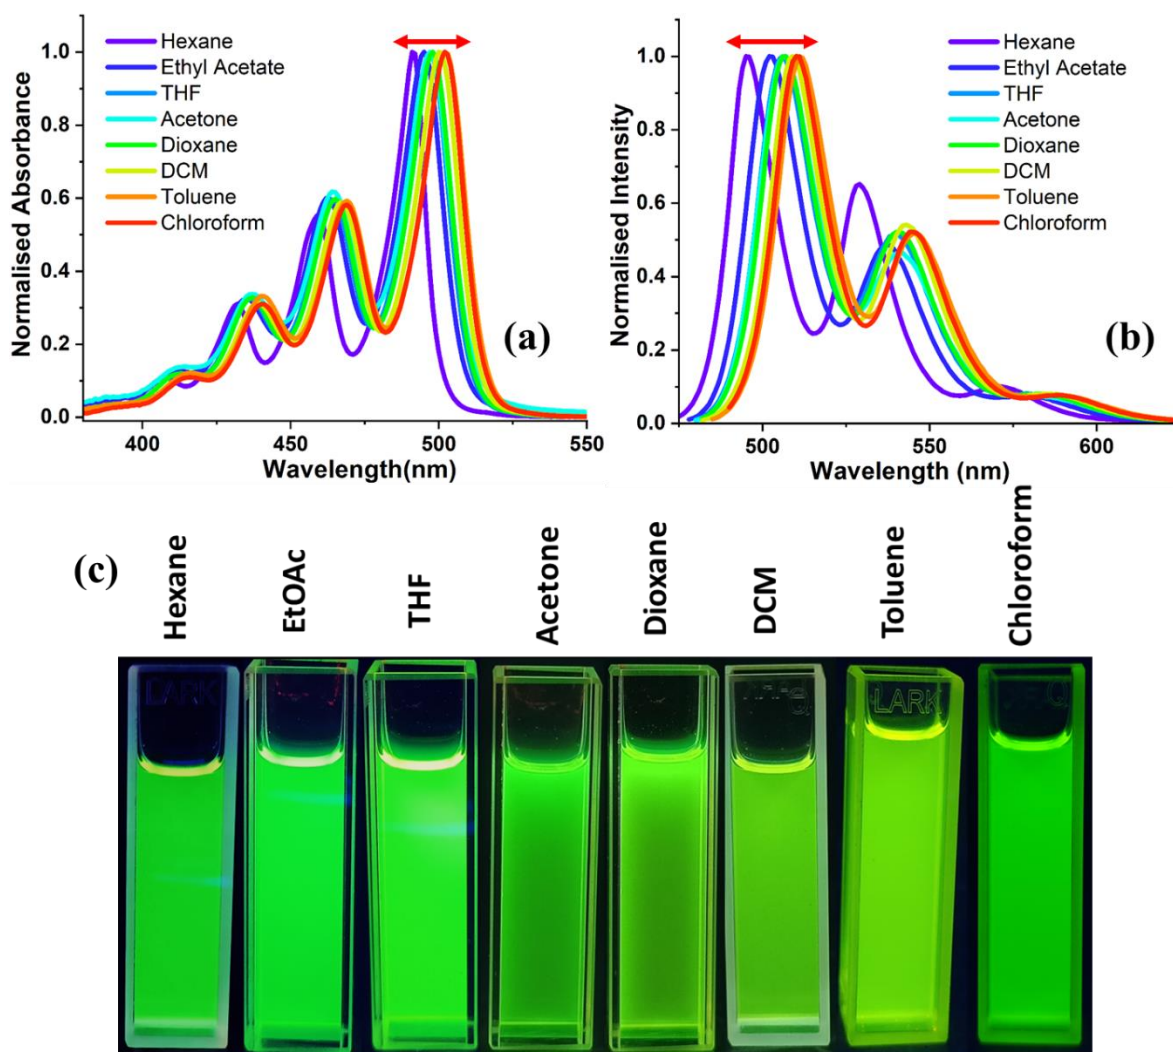

**Figure S25.** Absorption (a) and Fluorescence (b) spectra of compound **PBI-S<sup>ST</sup>** obtained in a diverse range of solvents; (c) Solution state images of **PBI-S<sup>ST</sup>** in a diverse range of solvents.

**Table S7.** Photophysical properties of **PBI-S<sup>ST</sup>** in a diverse range of solvents varying with polarity.

| Solvent    | Absorption (nm) | Emission (nm) |
|------------|-----------------|---------------|
| Hexane     | 490             | 495           |
| EtOAc      | 495             | 502           |
| THF        | 497             | 506           |
| Acetone    | 497             | 506           |
| Dioxane    | 498             | 507           |
| DCM        | 500             | 509           |
| Toluene    | 502             | 511           |
| Chloroform | 502             | 510           |

## 18. Time resolved photoluminescence studies

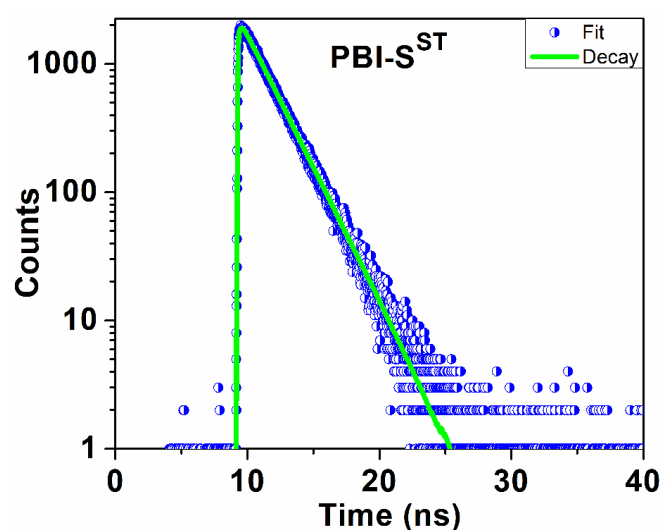

**Figure S26.** Fluorescence lifetime decay spectra of emitter **PBI-S<sup>ST</sup>** in chloroform; Experimental decay in red-coloured circles; Mono-exponential fit in blue coloured line.

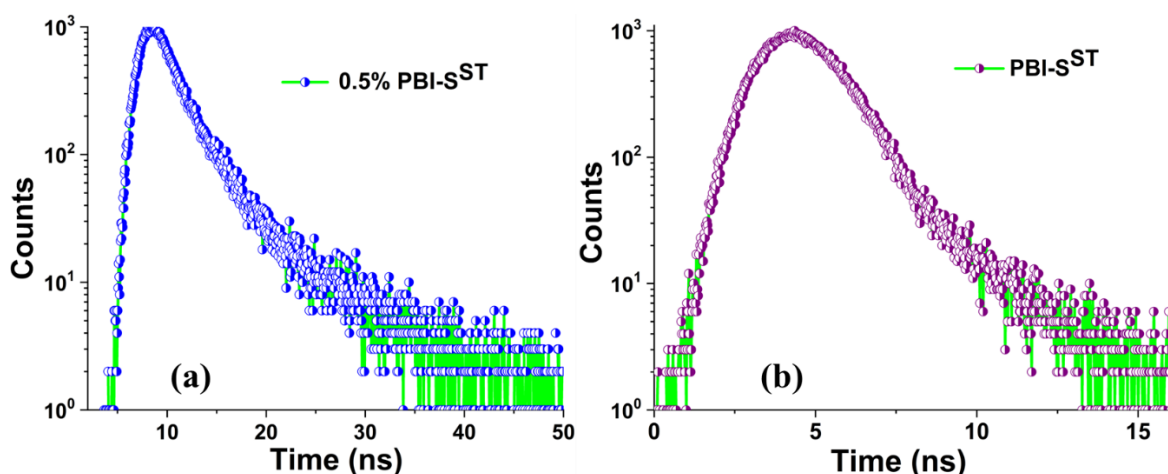

**Figure S27.** Fluorescence lifetime decay spectra of emitter **PBI-S<sup>ST</sup>** in undoped state (a); and in doped state (5 wt% CBP) (b).

The detailed quantum chemical calculations including natural transition orbitals, singlet-triplet energy levels and transition density matrix calculations for the perylene based emitter **PBI-S<sup>ST</sup>** supports the locally excited dominant HLCT character as also reported earlier for the perylene based emitters.<sup>S10</sup> In addition, mono-exponential fluorescence decay lifetime (Fig. S26) further reinforced our findings. In case of planar molecular structures, triplet-triplet annihilation (TTA) can also be responsible for the high exciton utilization efficiency. In the present case the overall structure of the **PBI-S<sup>ST</sup>** molecule is not exactly planar as can be seen from the optimized structure as provided in the Figure S19a, b.

## 19. References

- S1. Siddiqui, A., Thawarkar, S. and Singh, S.P., A novel perylene diimide molecule: Synthesis, structural property relationship and nanoarchitectonics, *J. Solid State Chem.* **2022**, 306, 122687.
- S2. Rocard, L., Hatych, D., Chartier, T., Cauchy, T. and Hudhomme, P., Original Suzuki–Miyaura Coupling Using Nitro Derivatives for the Synthesis of Perylene diimide-Based Multimers, *Eur. J. Org. Chem.* **2019**(47), 7635–7643.
- S3. N. Godbert, A. Crispini, M. Ghedini, M. Carini, F. Chiaravallotti, and A. Ferrised, *J. Appl. Cryst.*, 2014, 47, 668–679.
- S4. a) Gaussian 09, Revision B.01, M. J. Frisch, G. W. Trucks, H. B. Schlegel, G. E. Scuseria, M. A. Robb, J. R. Cheeseman, G. Scalmani, V. Barone, B. Mennucci, G. A. Petersson, H. Nakatsuji, M. Caricato, X. Li, H. P. Hratchian, A. F. Izmaylov, J. Bloino, G. Zheng, J. L. Sonnenberg, M. Hada, M. Ehara, K. Toyota, R. Fukuda, J. Hasegawa, M. Ishida, T. Nakajima, Y. Honda, O. Kitao, H. Nakai, T. Vreven, J. J. A. Montgomery, J. E. Peralta, F. Ogliaro, M. Bearpark, J. J. Heyd, E. Brothers, K. N. Kudin, V. N. Staroverov, R. Kobayashi, J. Normand, K. Raghavachari, A. Rendell, J. C. Burant, S. S. Iyengar, J. Tomasi, M. Cossi, N. Rega, J. M. Millam, M. Klene, J. E. Knox, J. B. Cross, V. Bakken, C. Adamo, J. Jaramillo, R. Gomperts, R. E. Stratmann, O. Yazyev, A. J. Austin, R. Cammi, C. Pomelli, J. W. Ochterski, R. L. Martin, K. Morokuma, V. G. Zakrzewski, G. A. Voth, P. Salvador, J. J. Dannenberg, S. Dapprich, A. D. Daniels, O. Farkas, J. B. Foresman, J. V. Ortiz and J. Cioslowski Fox, *D. J. Gaussian Inc., Wallingford, CT*, **2009**; b) C. Lee, W. Yang and R. G. Parr, *Phys. Rev. B*, **1988**, 37, 785–789; c) A. D. Becke, *J. Chem. Phys.*, **1993**, 98, 1372–1377.
- S5. Liu, T., Zhu, L., Gong, S., Zhong, C., Xie, G., Mao, E., Fang, J., Ma, D. and Yang, C., A red fluorescent emitter with a simultaneous hybrid local and charge transfer excited state and aggregation-induced emission for high-efficiency, low efficiency roll-off OLEDs. *Adv. Opt. Mater.*, **2017**, 5(13), 1700145.
- S6. C. A. Fuller, and C. E. Finlayson, Solvatochromism in perylene diimides; experiment and theory, *Phys. Chem. Chem. Phys.*, 2017, 19, 31781.
- S7. R. K. Konidena, K. J. Thomas, D. K. Dubey, S. Sahoo and J. H. Jou, A new molecular design based on hybridized local and charge transfer fluorescence for highly efficient (> 6%) deep-blue organic light emitting diodes, *Chem. Commun.*, 2017, 53, 11802–11805.
- S8. I. Bala, N. Singh, R. A. K. Yadav, J. De, S. P. Gupta, D. P. Singh, D. K. Dubey, J. H. Jou, R. Doualid, and S. K. Pal, Room temperature perylene based columnar liquid crystals as solid-state fluorescent emitters in solution-processable organic light-emitting diodes, *J. Mater. Chem. C*, 2020, 8, 12485–12494.
- S9. X. Tang, Q. Bai, Q. Peng, Y. Gao, J. Li, Y. Liu, L. Yao, P. Lu, B. Yang and Y. Ma, Efficient Deep Blue Electroluminescence with an External Quantum Efficiency of 6.8% and CIE<sub>y</sub> < 0.08 Based on a Phenanthroimidazole–Sulfone Hybrid Donor–Acceptor Molecule, *Chem. Mater.*, 2015, 27, 7050–7057.

S10. Shen, Y., Zhang, Z., Liu, H., Yan, Y., Zhang, S., Yang, B. and Ma, Y., Highly efficient orange-red/red excimer fluorescence from dimeric  $\pi$ - $\pi$  stacking of perylene and its nanoparticle applications, *J. Phys. Chem. C*, **2019**, *123*(20), 13047-13056.
